# Supplementary material
Source: PubMed Central journal article supplement (PMC6645790)
Supplement: ao8b00295_si_001.pdf [file ao8b00295_si_001.pdf]

*SUPPORTING INFORMATION FOR:*

**Total Syntheses and Biological Evaluation of the *Ganoderma lucidum* Alkaloids Lucidimines B and C**

*Yongsheng Chen<sup>†</sup> and Ping Lan<sup>†,\*</sup>*

*<sup>†</sup>Department of Food Science and Engineering, Jinan University, Guangzhou, 510632, China*

*Corresponding Author*

*\*Tel.: 86-20-85221367. Fax: 86-20-85224766. E-mail: ping.lan@jnu.edu.cn*

| <b>CONTENTS</b>                                                                                | <b>PAGE</b> |
|------------------------------------------------------------------------------------------------|-------------|
| <sup>1</sup> H and <sup>13</sup> C NMR Spectra of Compounds <b>2, 3, 7, 9</b> and <b>11-15</b> | <b>S2</b>   |

—8.32

7.49  
7.48

6.81  
6.79  
6.76  
6.75  
6.73  
6.73

—5.12

3.01  
2.99  
2.97  
2.92  
2.90  
2.88

2.22  
2.20  
2.18  
2.16  
2.14

Figure S1. 400 MHz <sup>1</sup>H NMR Spectrum of Compound 2 (Recorded in CD<sub>3</sub>OD)

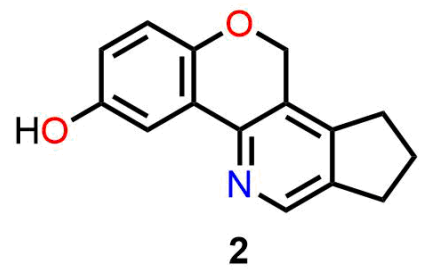

H<sub>2</sub>O

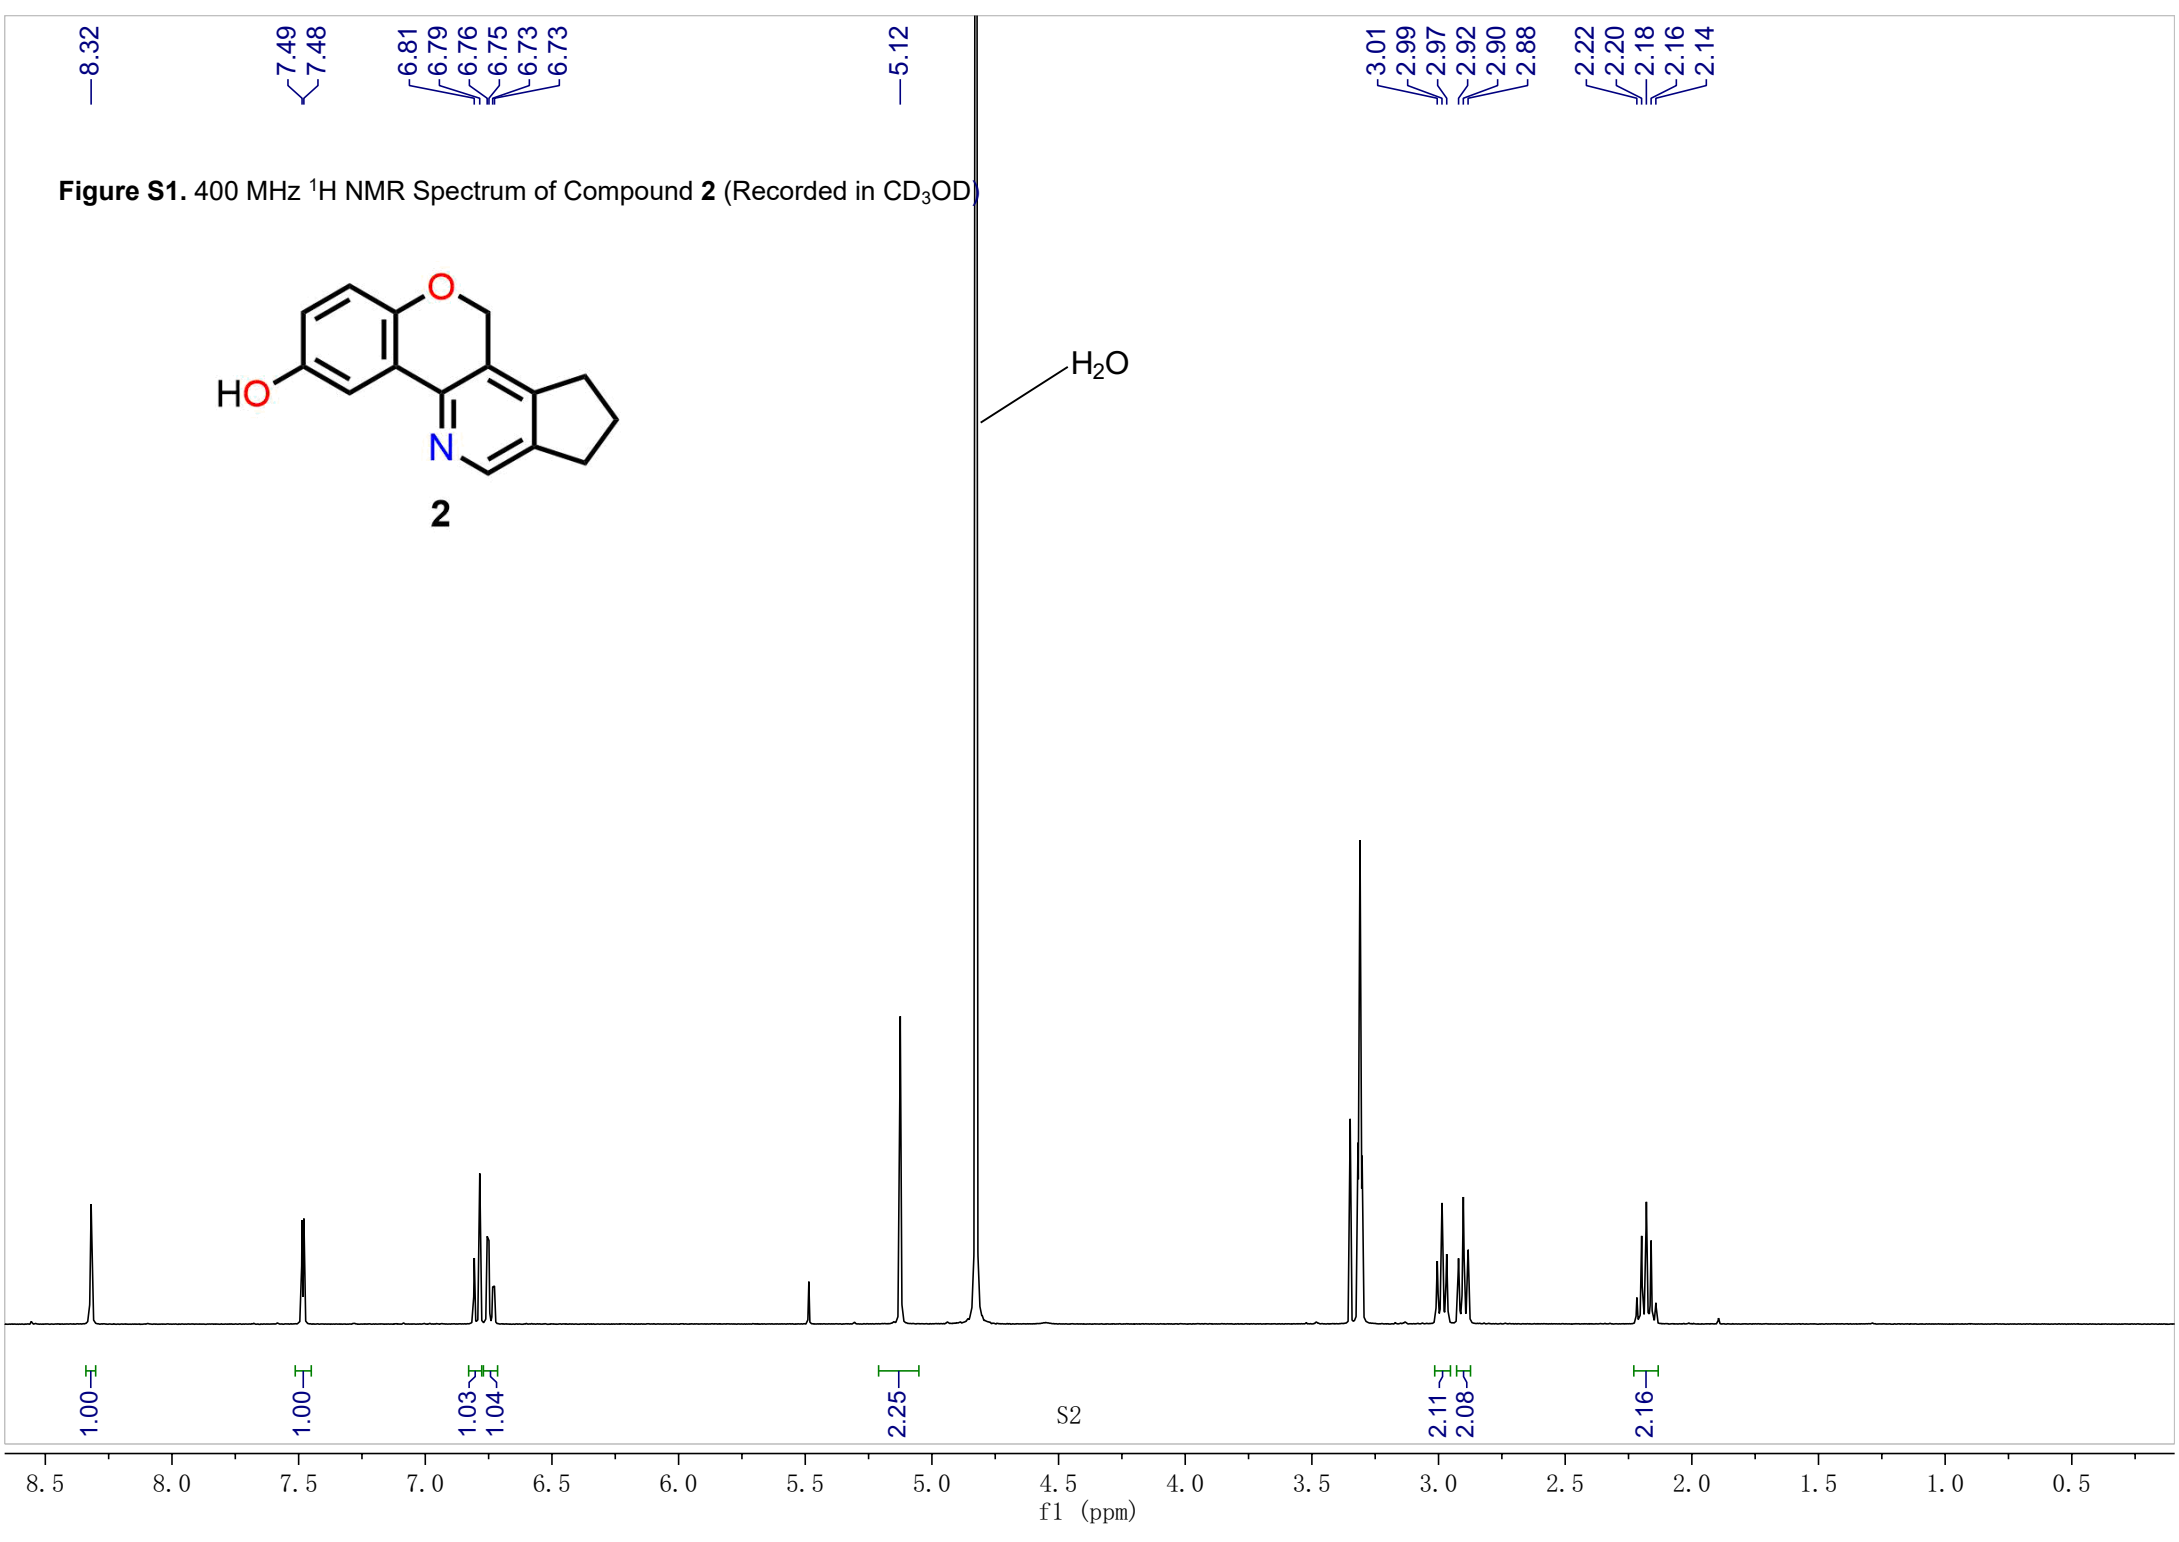

153.58  
151.33  
150.76  
147.32  
144.97  
141.57

125.04  
124.88  
118.94  
118.72

111.20

66.52

31.13  
30.96  
26.13

Figure S2. 100 MHz <sup>13</sup>C NMR Spectrum of Compound 2 (Recorded in CD<sub>3</sub>OD)

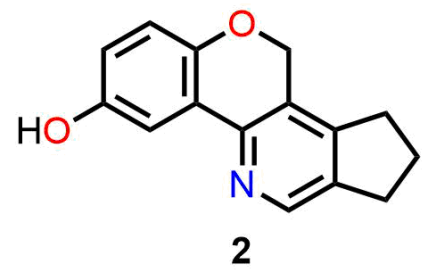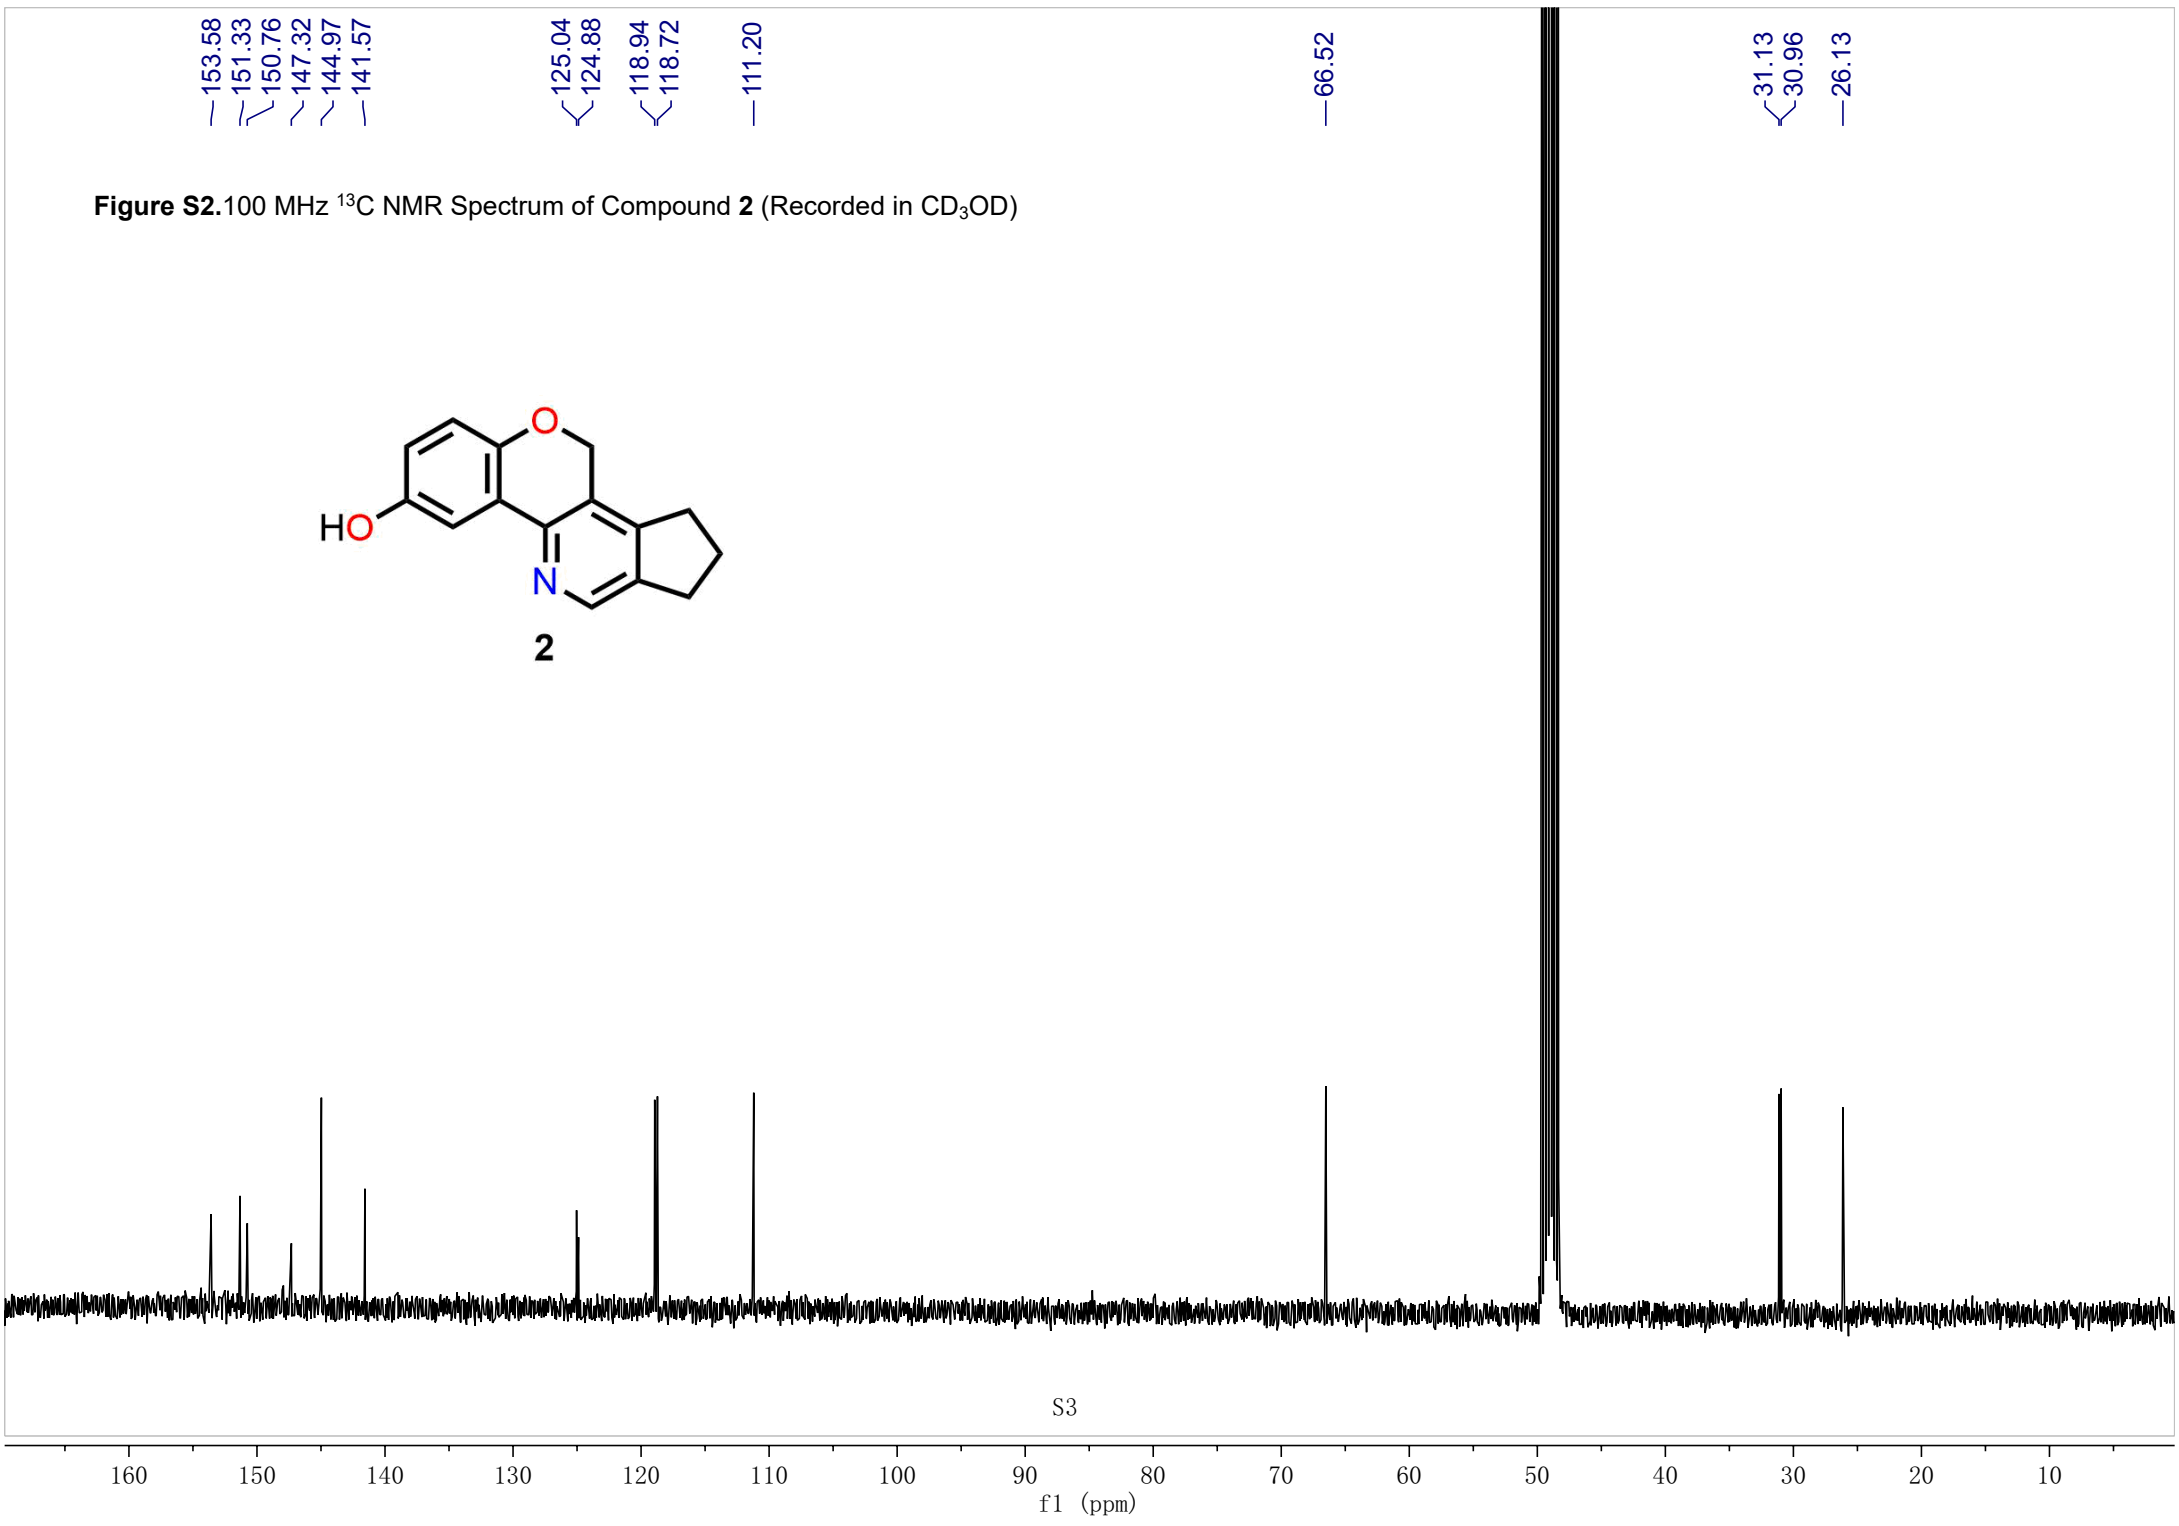

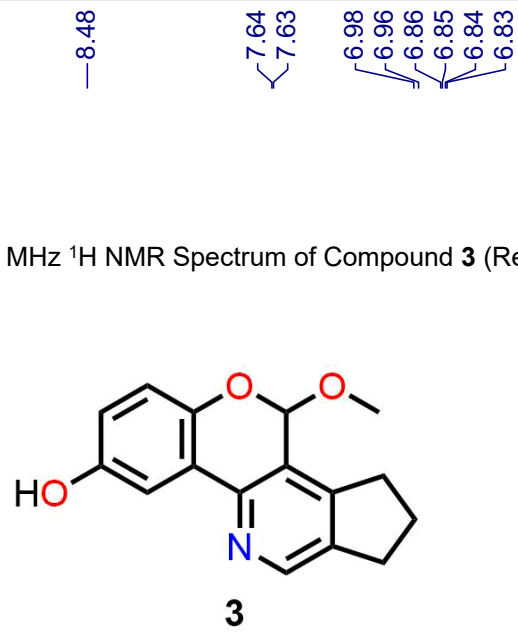

**Figure S3.** 400 MHz <sup>1</sup>H NMR Spectrum of Compound **3** (Recorded in CD<sub>3</sub>OD)

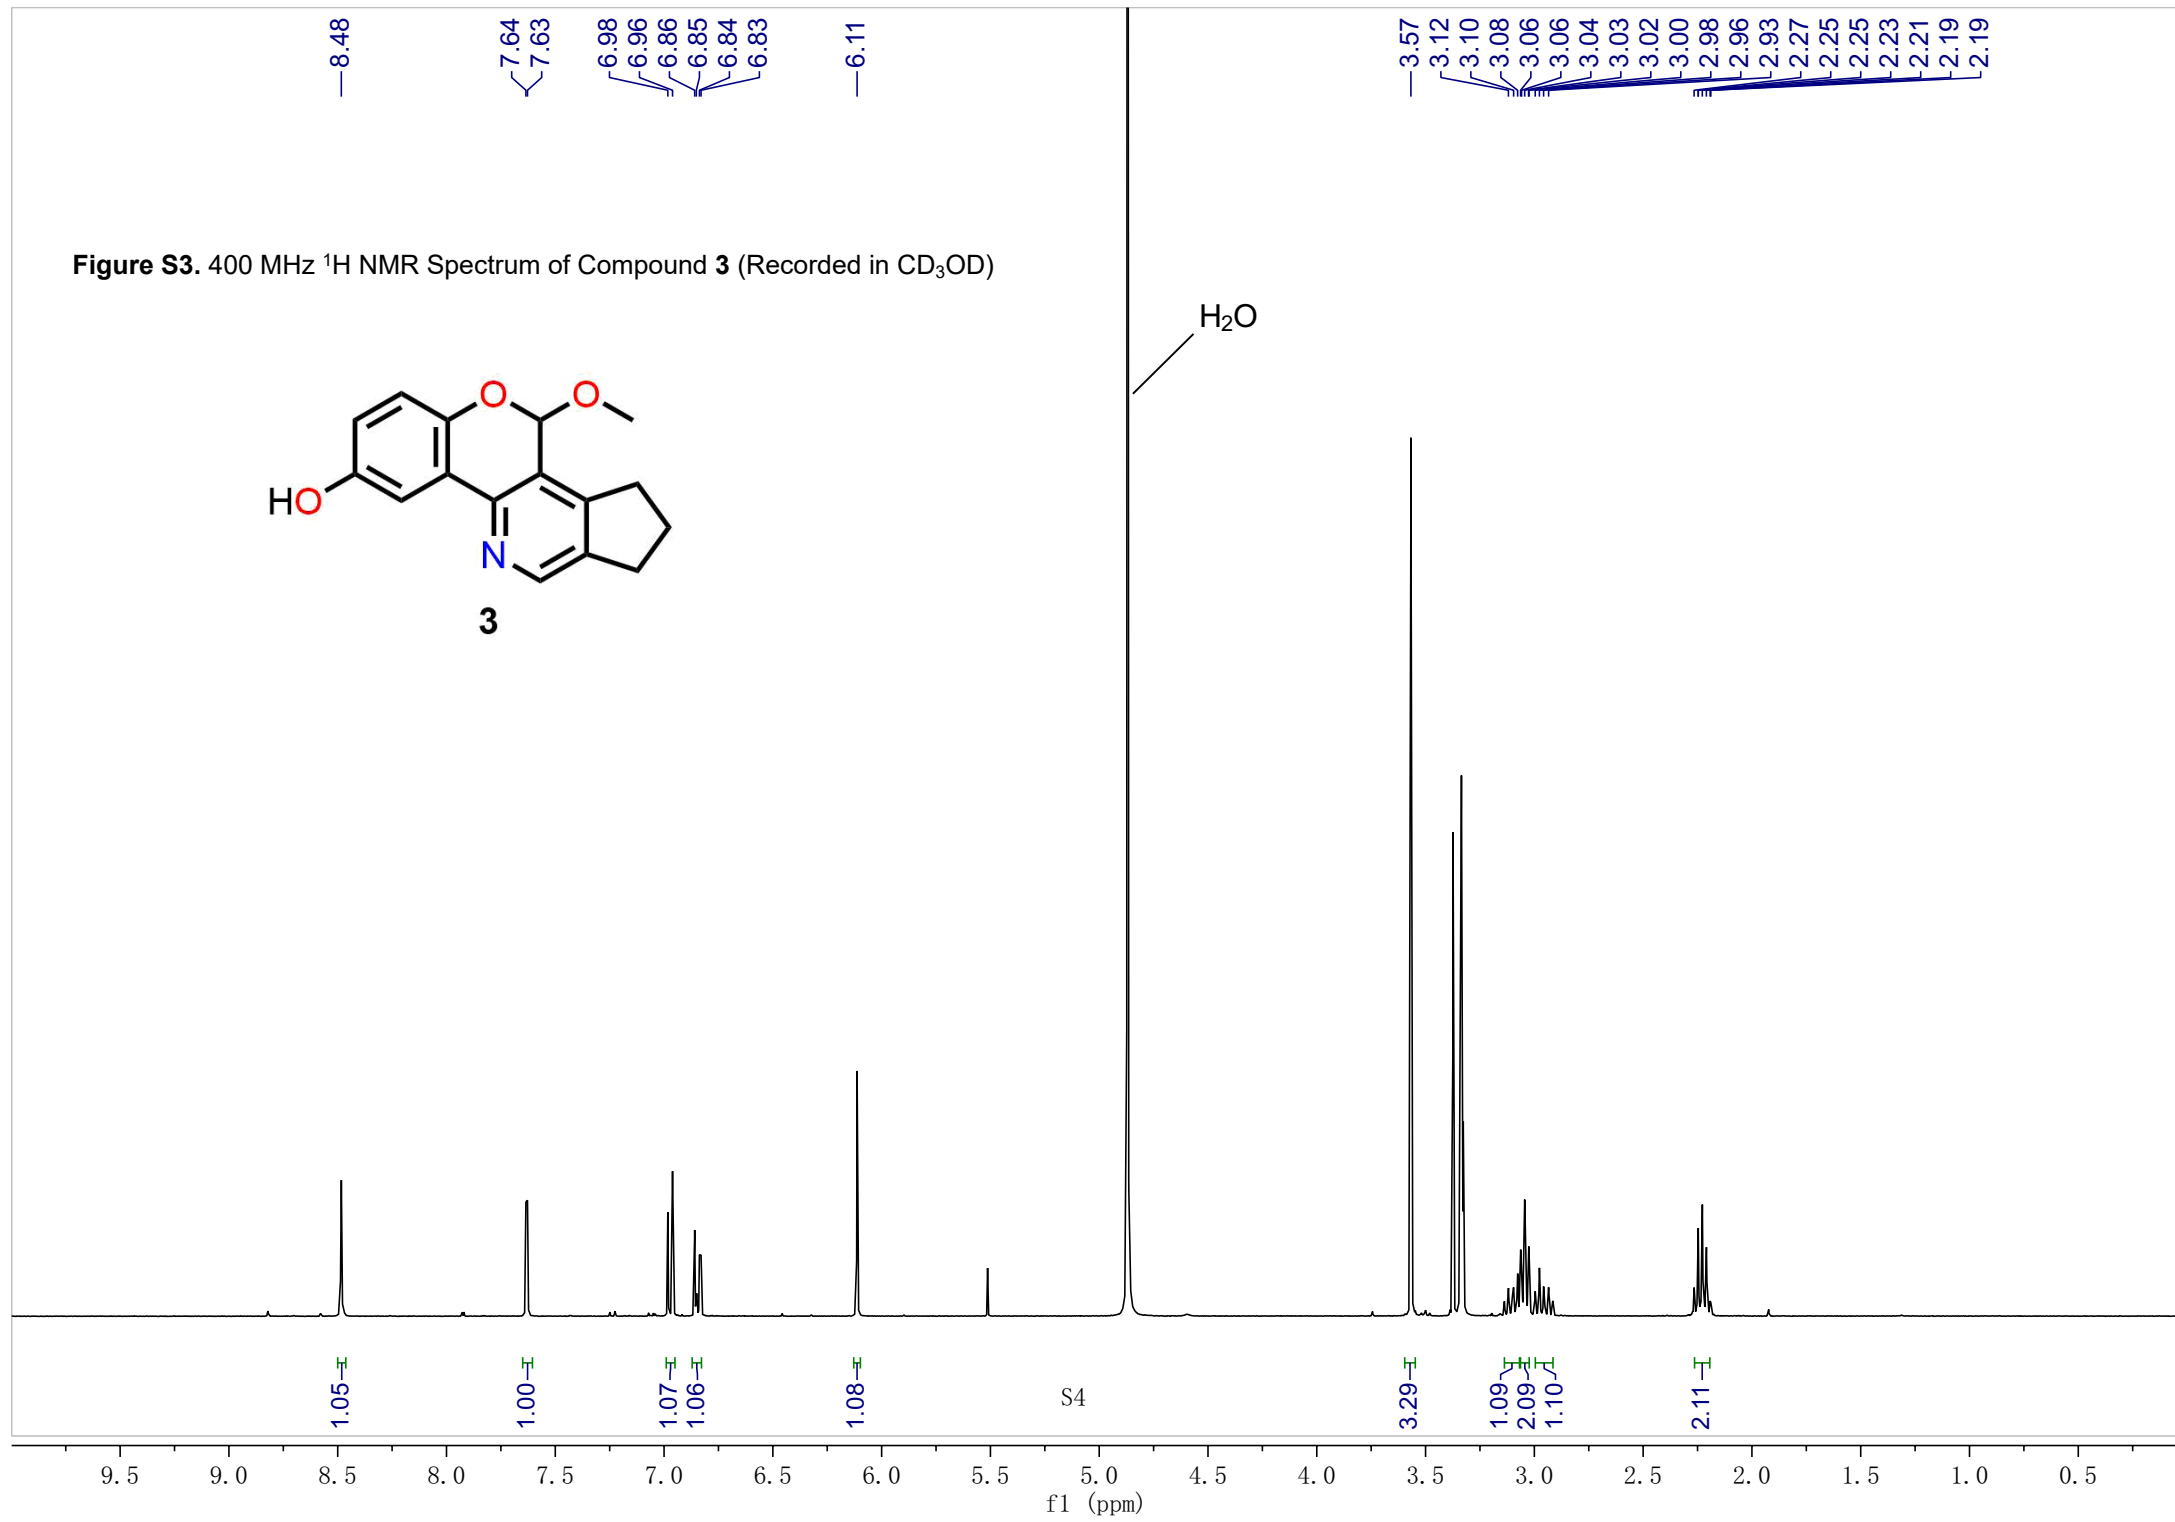

153.71  
153.39

146.71  
146.67  
145.96  
141.81

123.58  
123.47  
119.57  
119.02

110.83

98.13

55.92

31.17  
30.81  
26.09

Figure S4. 100 MHz  $^{13}\text{C}$  NMR Spectrum of Compound **3** (Recorded in  $\text{CD}_3\text{OD}$ )

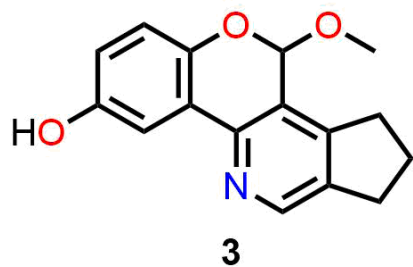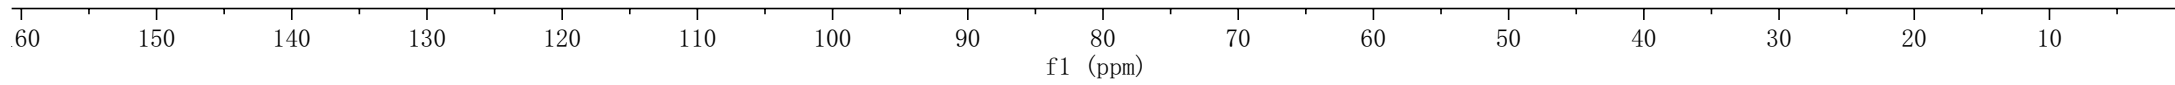

S5

Figure S5. 400 MHz <sup>1</sup>H NMR Spectrum of Compound 7 (Recorded in CDCl<sub>3</sub>)

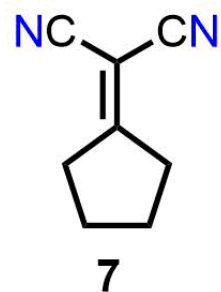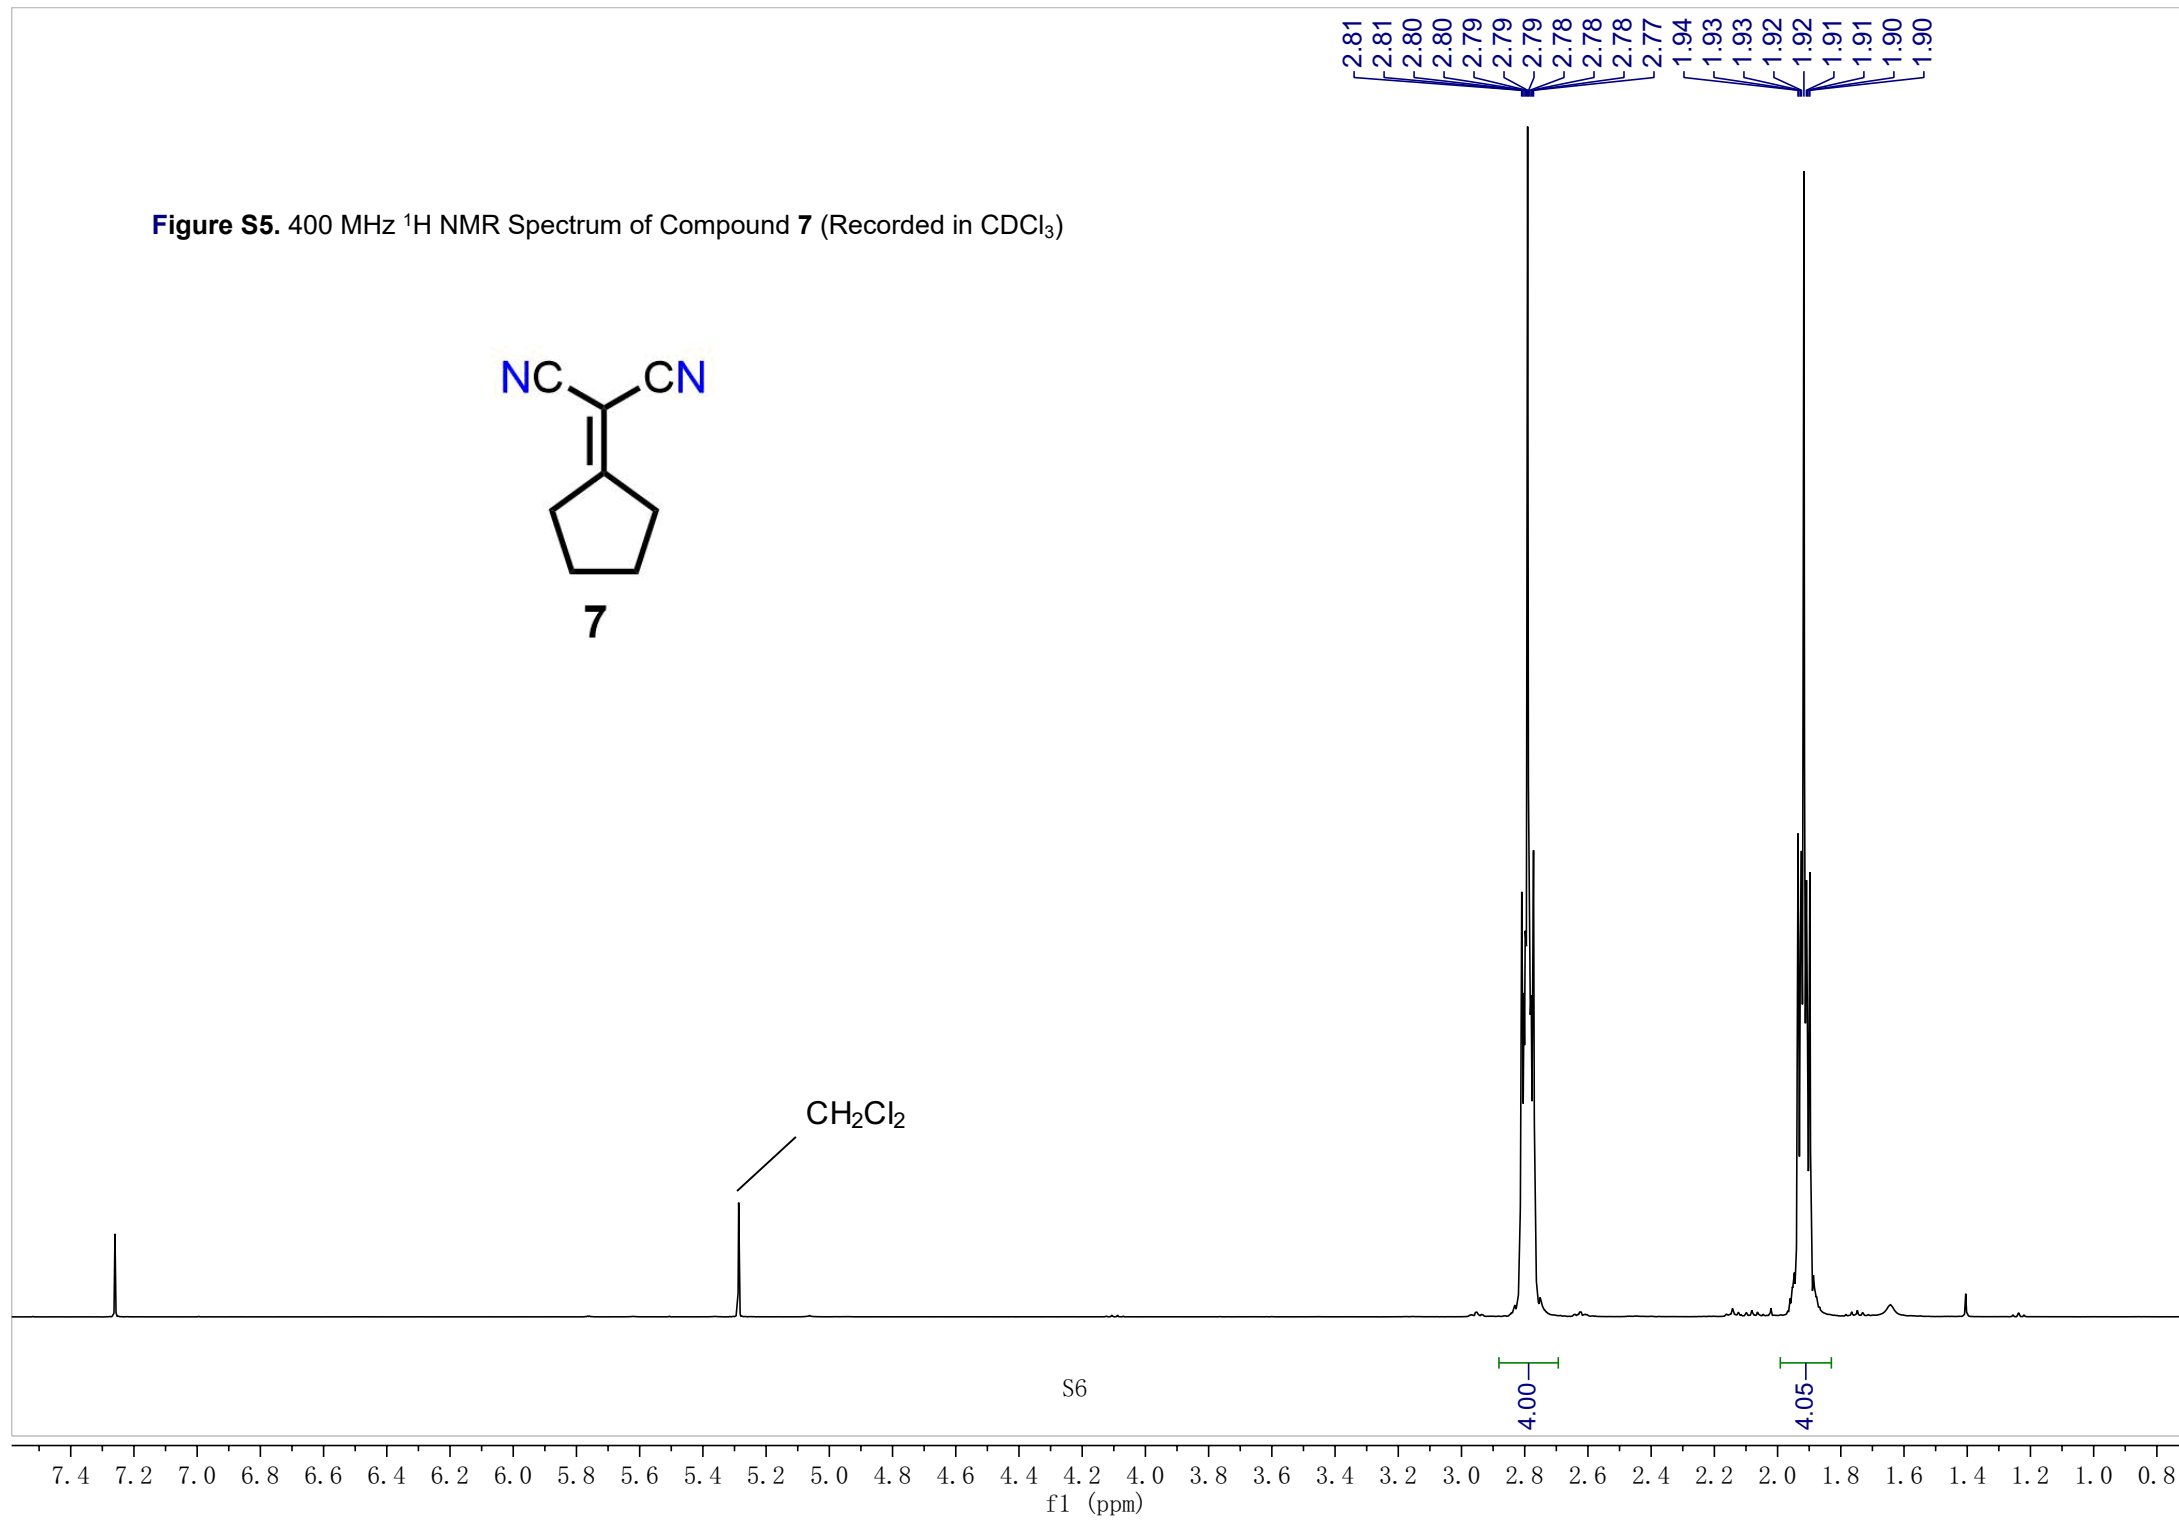

Figure S6. 100 MHz  $^{13}\text{C}$  NMR Spectrum of Compound 7 (Recorded in  $\text{CDCl}_3$ )

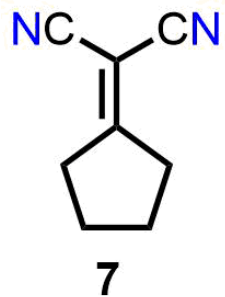

— 192.39

— 111.67

— 81.17

— 36.07

— 25.88

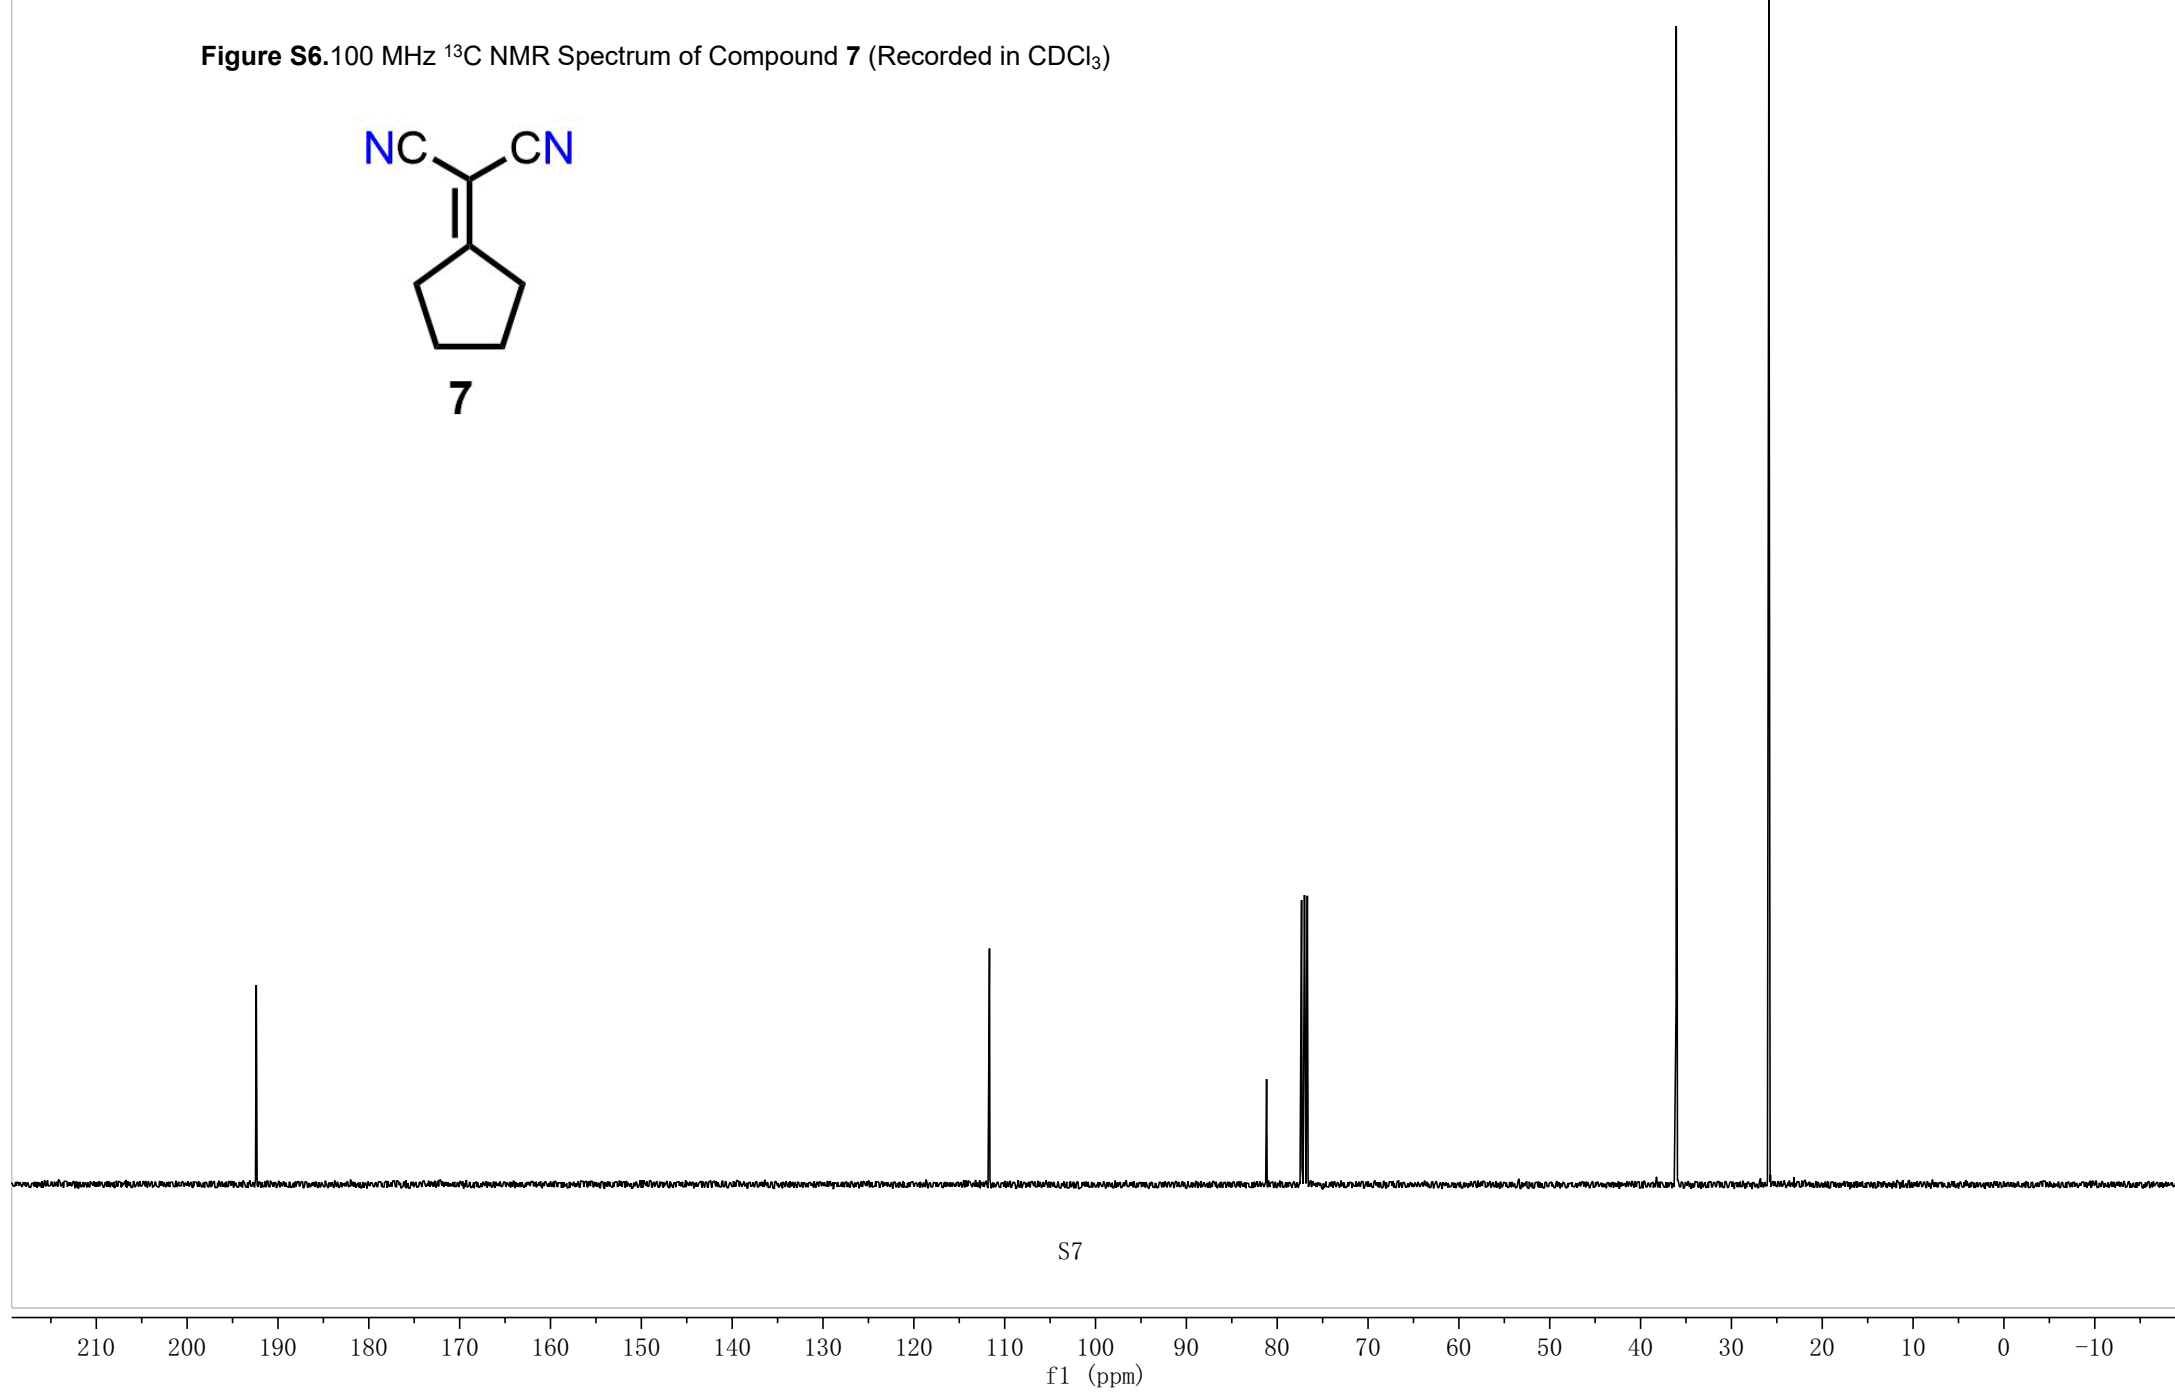

S7

Figure S7. 400 MHz <sup>1</sup>H NMR Spectrum of Compound **9** (Recorded in CDCl<sub>3</sub>)

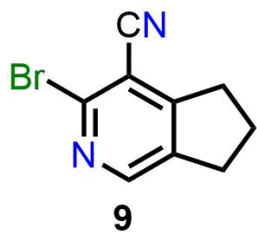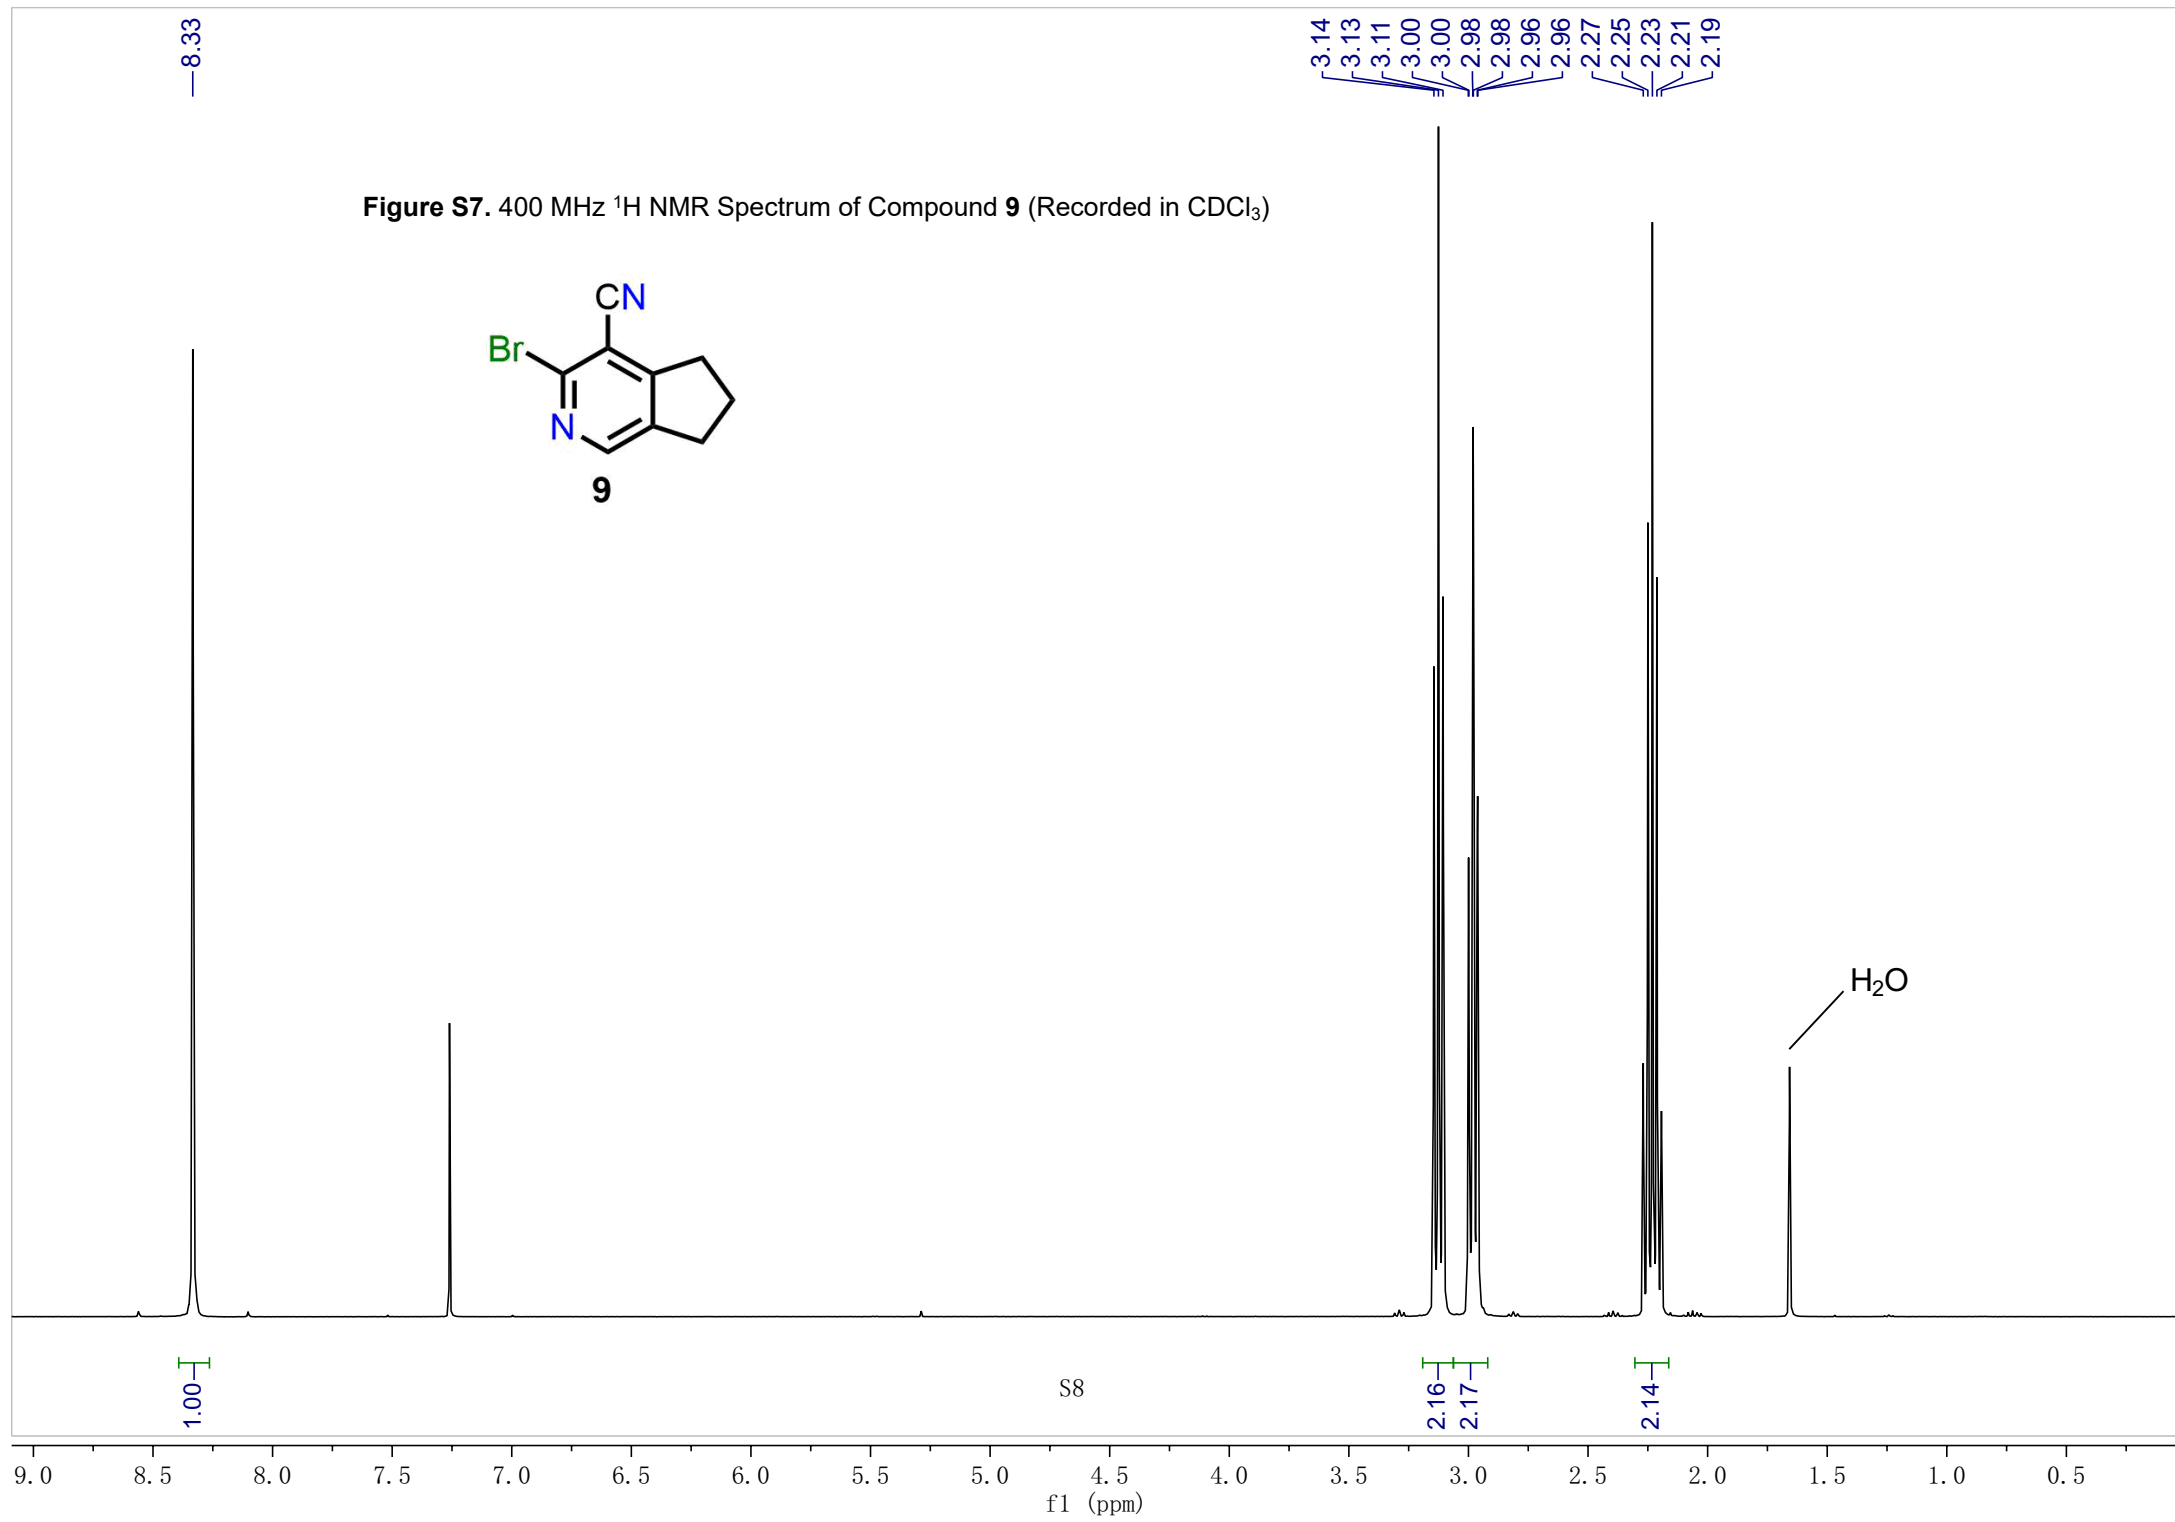





Figure S9. 400 MHz <sup>1</sup>H NMR Spectrum of Compound 11 (Recorded in CDCl<sub>3</sub>)

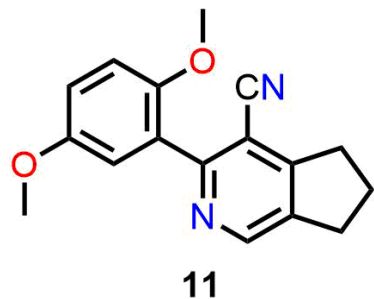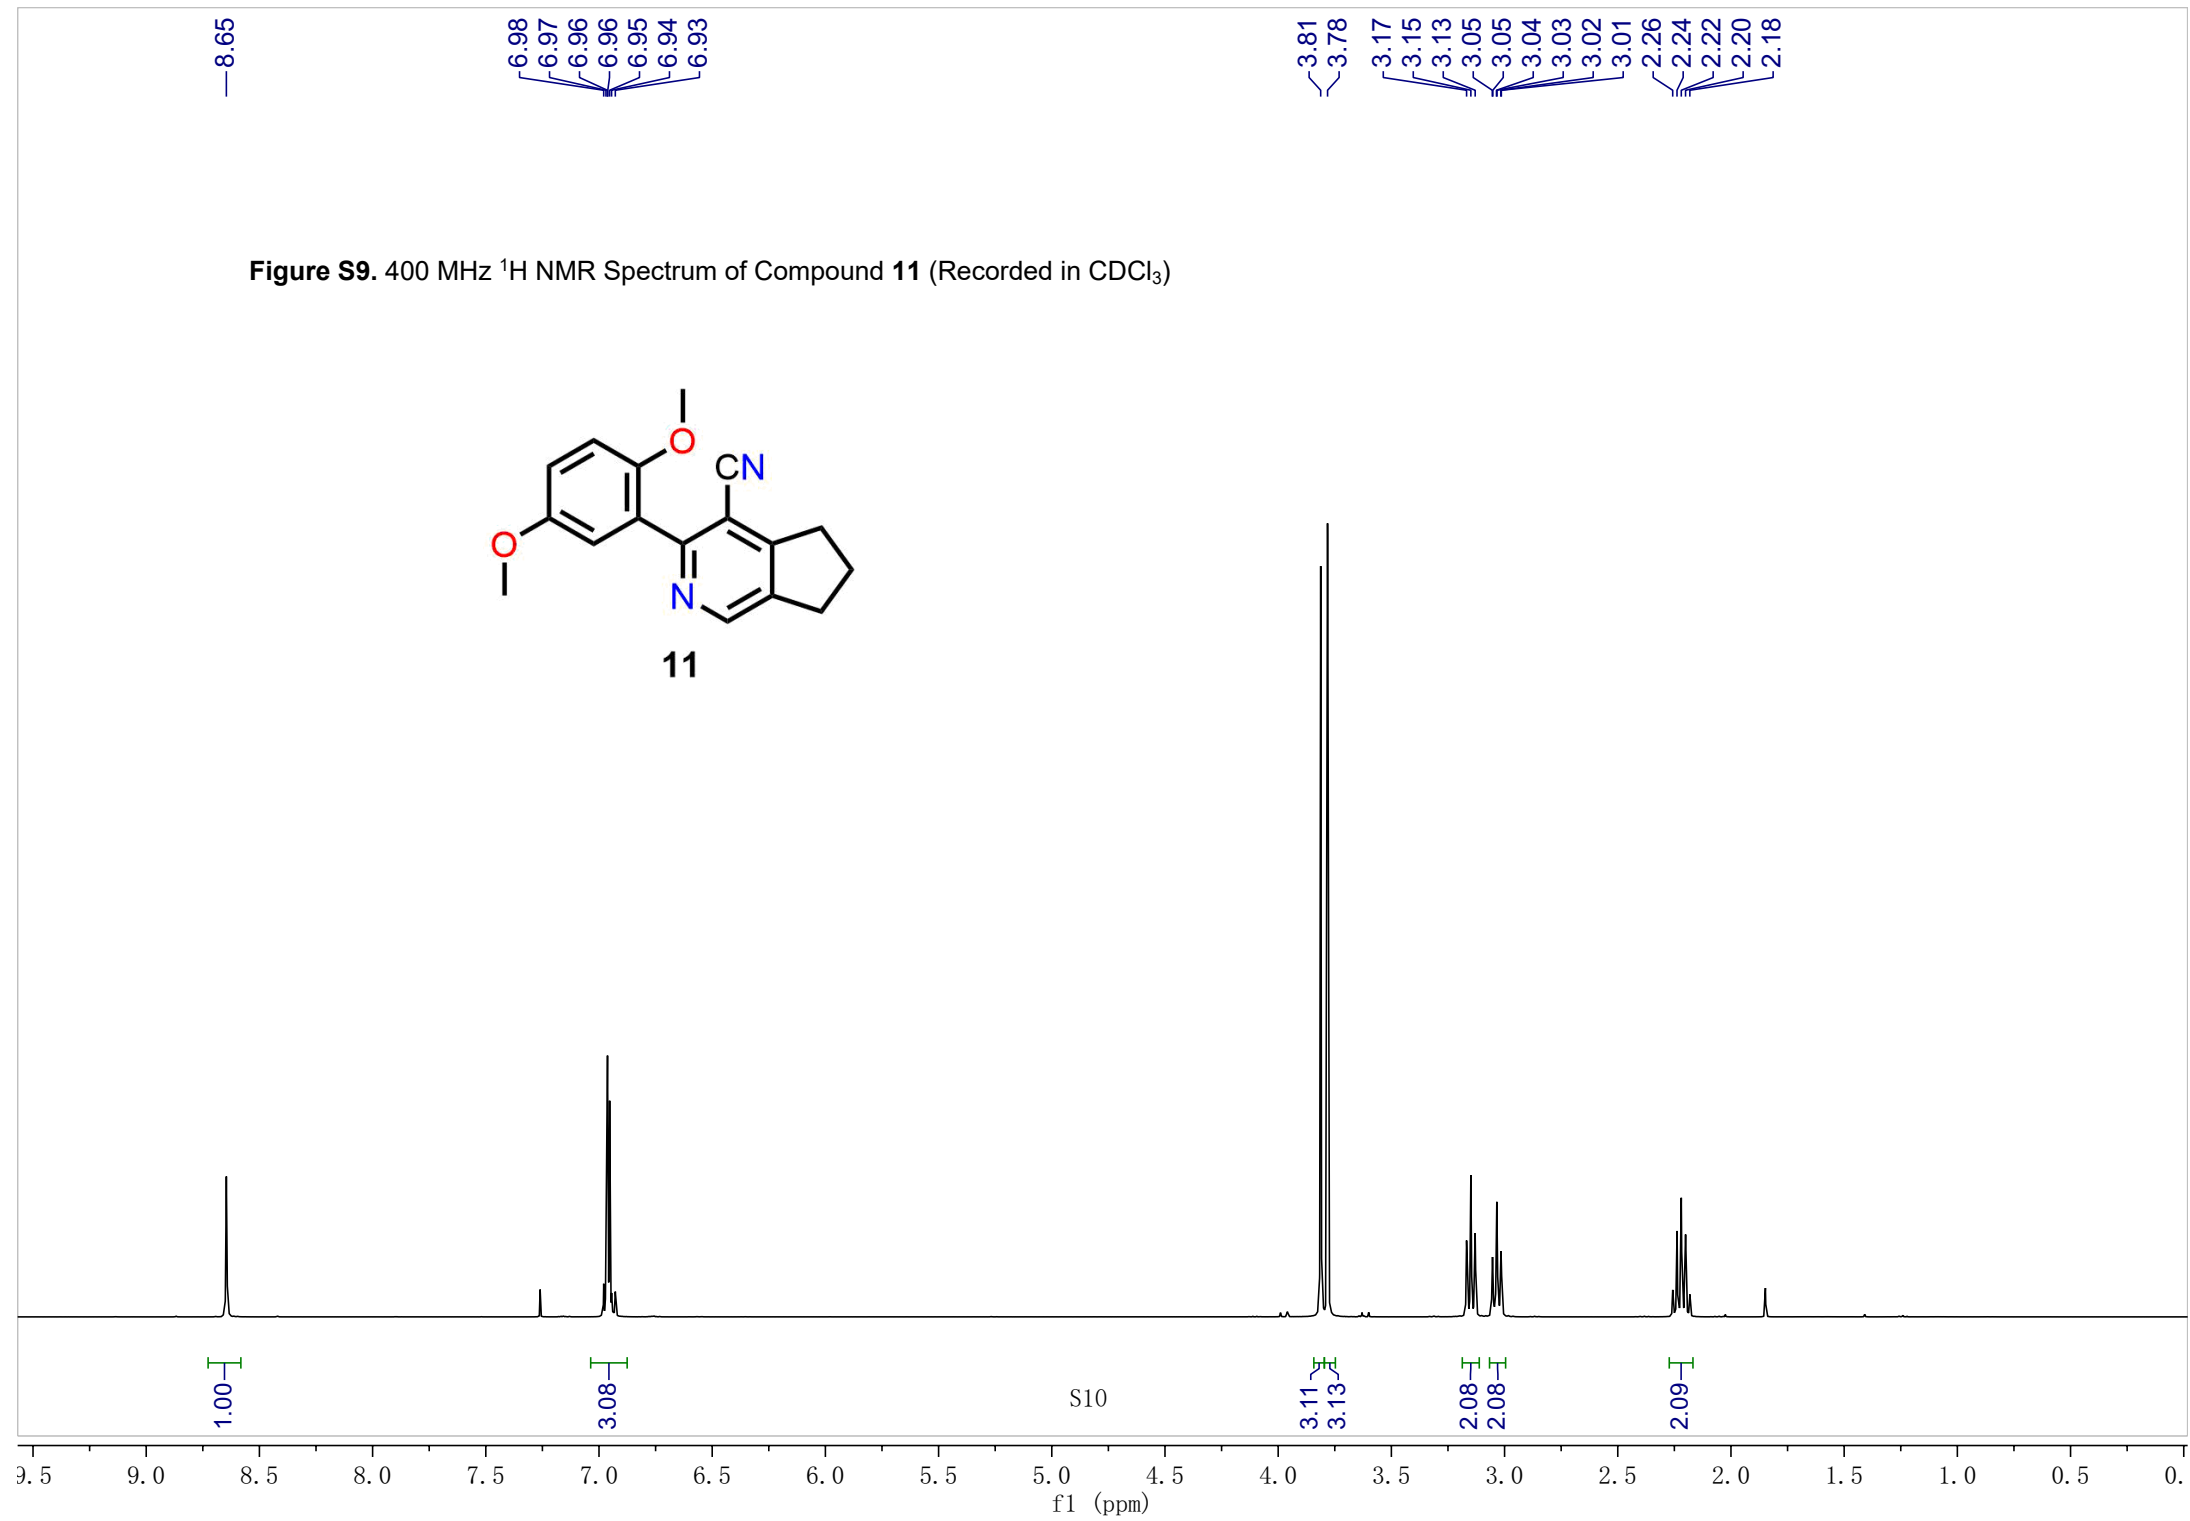

158.37  
156.75  
153.54  
150.80  
147.73

138.65

127.57

116.48  
116.18  
115.81  
112.41  
107.44

55.76  
55.72

32.71  
30.27

24.43

Figure S10. 100 MHz <sup>13</sup>C NMR Spectrum of Compound 11 (Recorded in CDCl<sub>3</sub>)

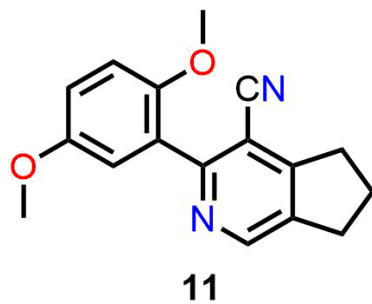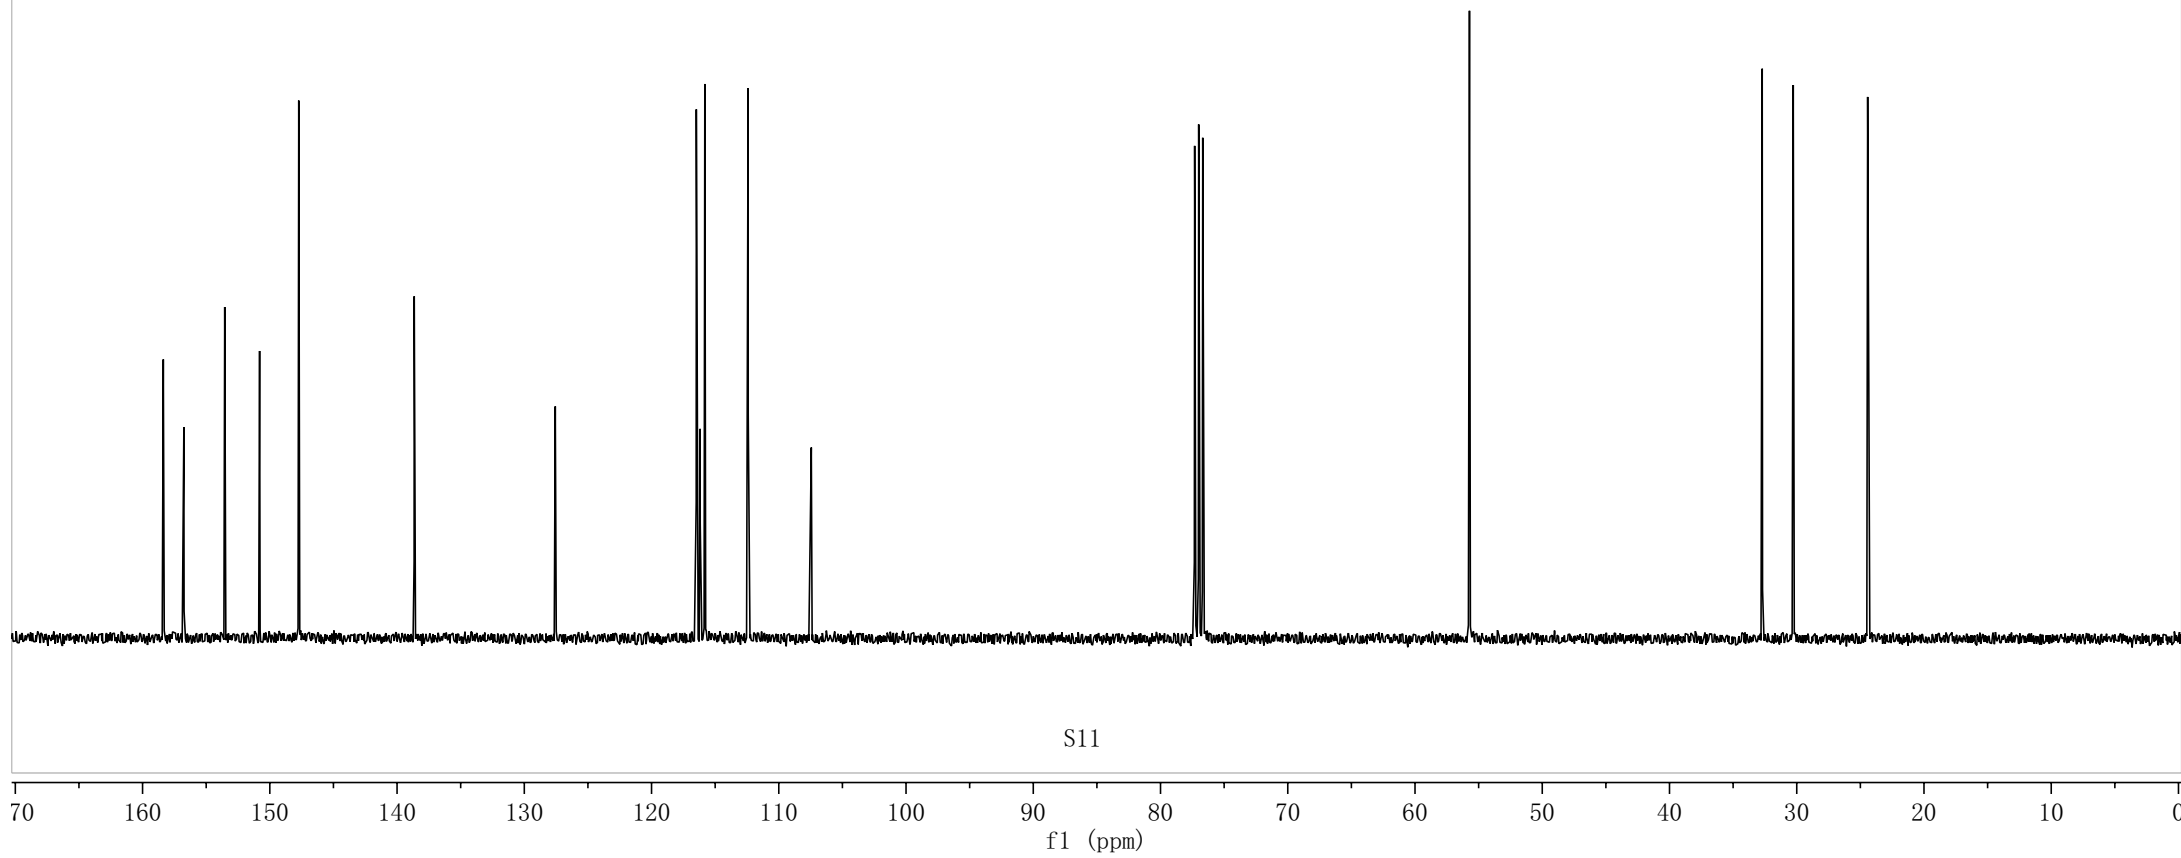

8.66

7.16  
7.16  
7.15  
7.15  
7.13  
7.11  
7.10

3.79  
3.33  
3.33  
3.32  
3.30  
3.30  
3.30  
3.29  
3.29  
3.28  
3.28  
3.26  
3.24  
3.22  
2.38  
2.36  
2.34  
2.32  
2.30

Figure S11. 400 MHz <sup>1</sup>H NMR Spectrum of Compound 12 (Recorded in CD<sub>3</sub>OD)

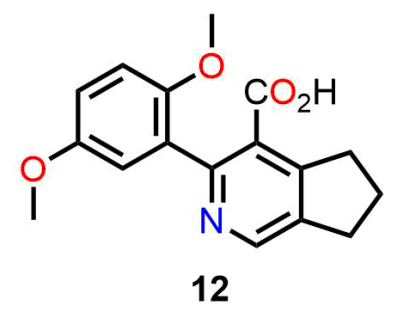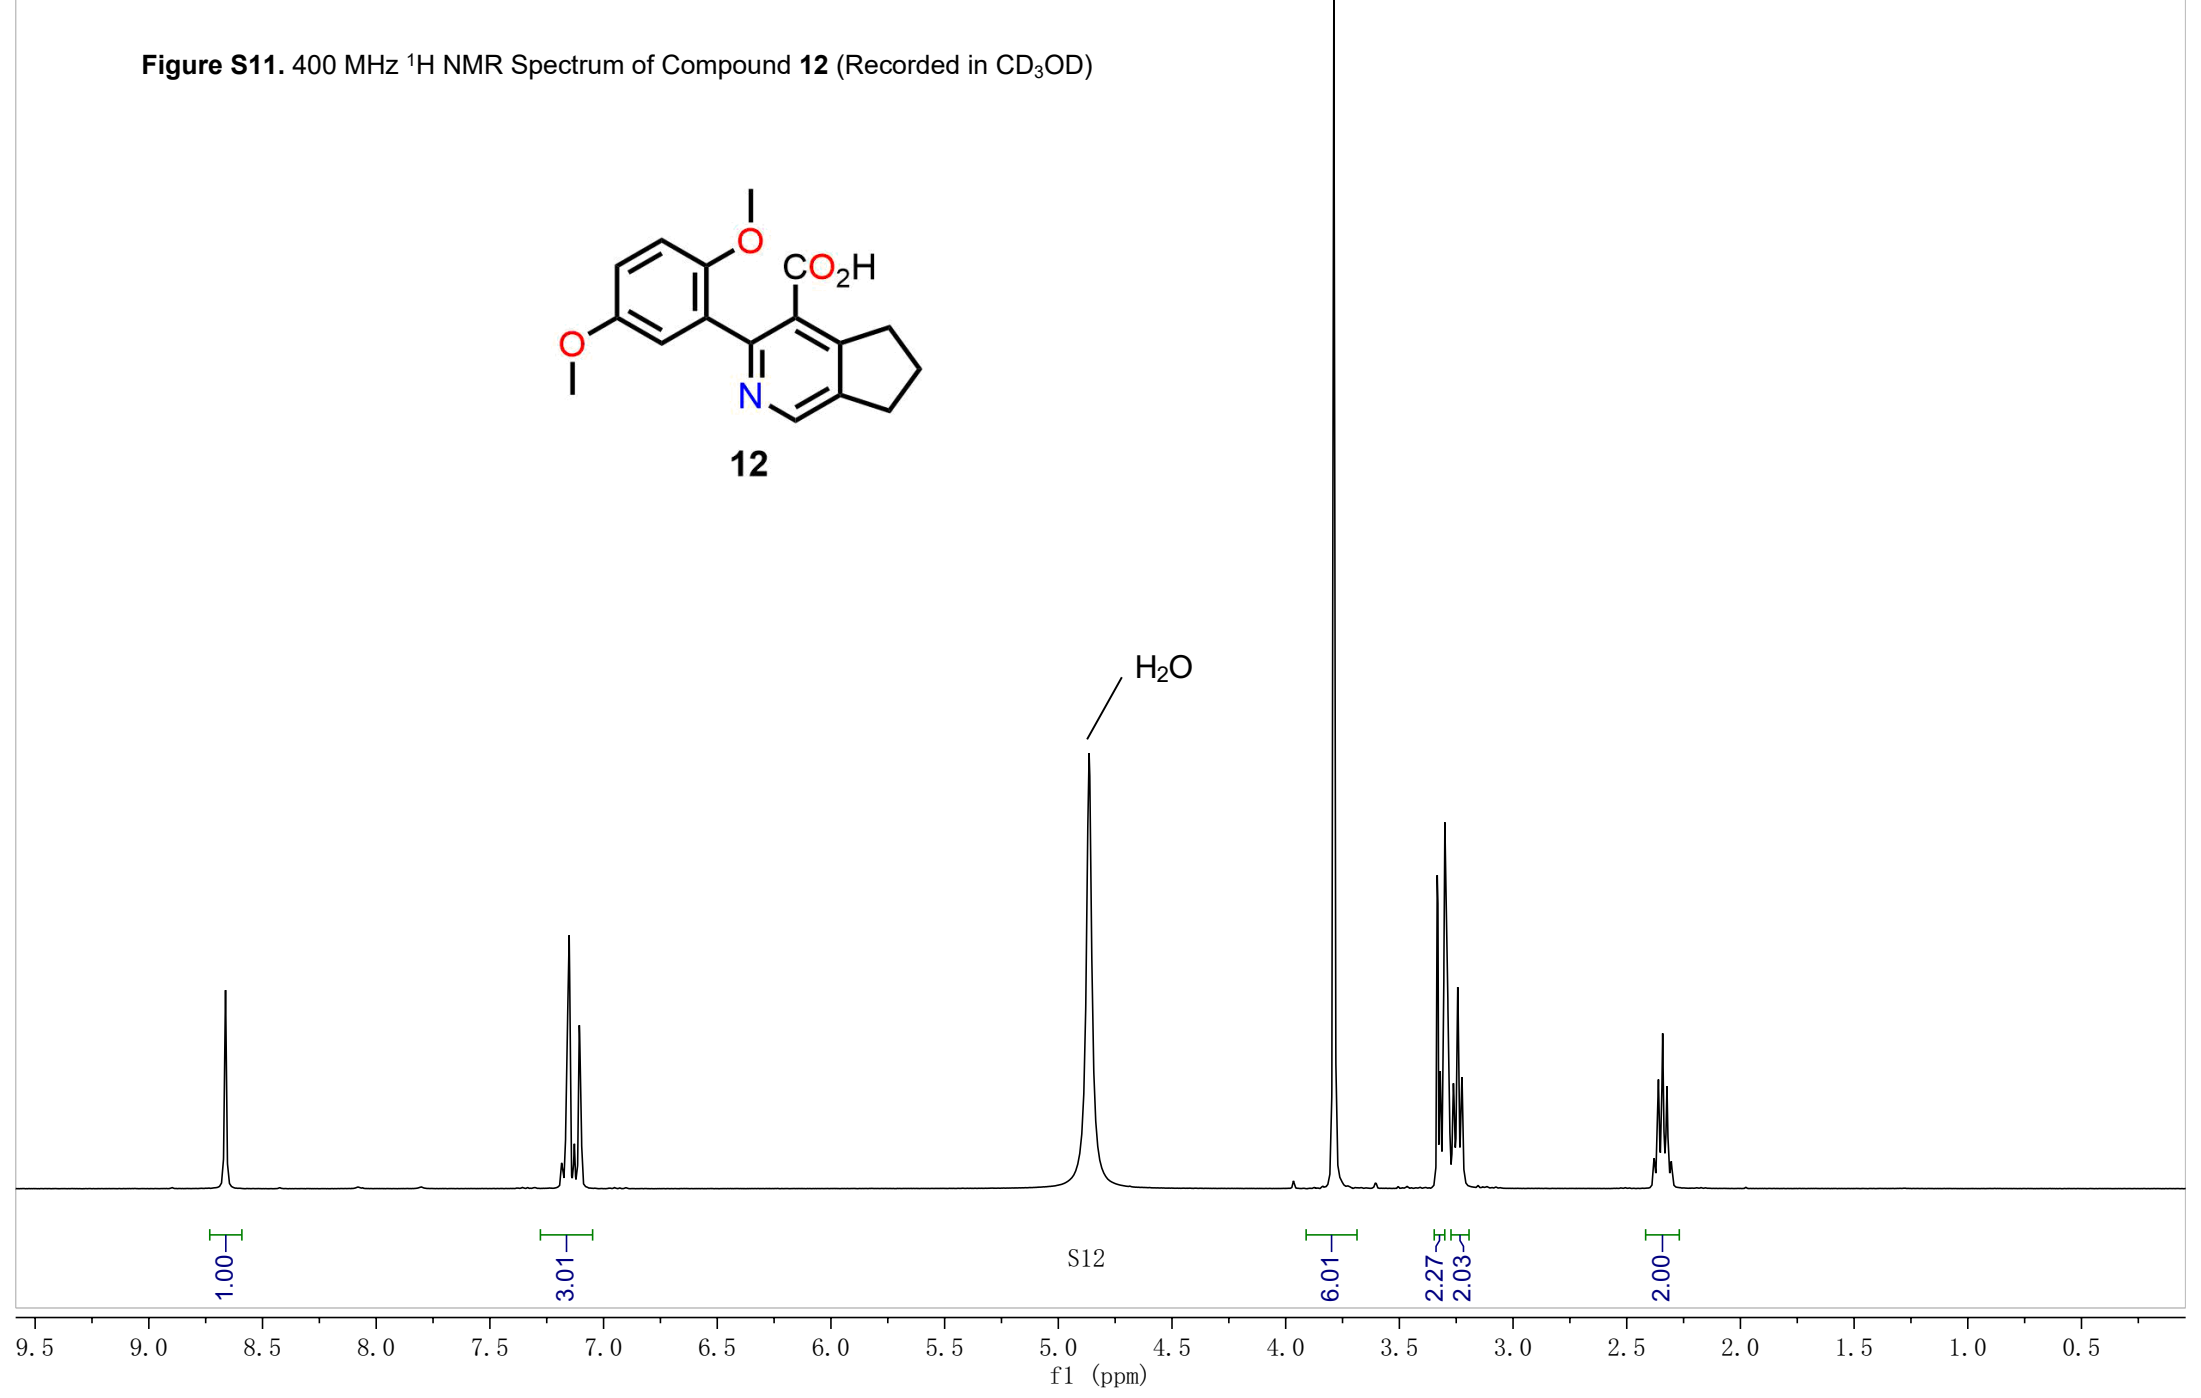

— 167.90  
— 165.17  
~ 155.01  
~ 152.36  
~ 147.30  
~ 145.54  
— 137.77  
— 134.46  
~ 120.67  
~ 119.70  
~ 117.33  
~ 113.99  
{ 56.56  
{ 56.42  
— 34.41  
— 31.54  
— 25.98

**Figure S12.** 100 MHz  $^{13}\text{C}$  NMR Spectrum of Compound **12** (Recorded in  $\text{CD}_3\text{OD}$ )

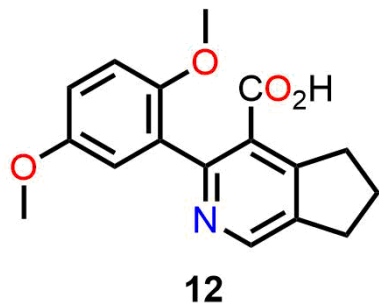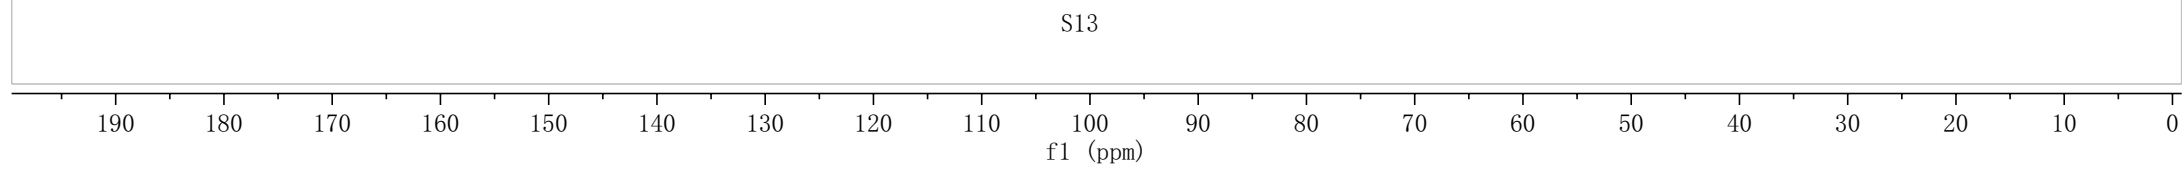

S13

—9.74

—8.85

7.81  
7.80  
7.26  
7.24  
7.02  
7.02  
7.00  
7.00

3.37  
3.35  
3.03  
3.01  
2.99

2.17  
2.15  
2.14  
2.13  
2.11  
2.09

Figure S13. 400 MHz <sup>1</sup>H NMR Spectrum of Compound 13 (Recorded in DMSO-d<sub>6</sub>)

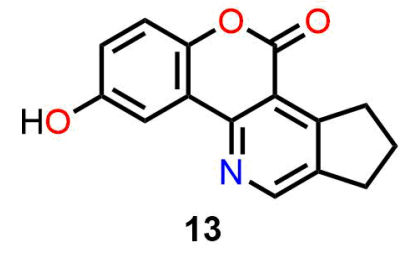

H<sub>2</sub>O

0.94

1.00

1.01

1.01

1.06

S14

2.40

2.03

2.08

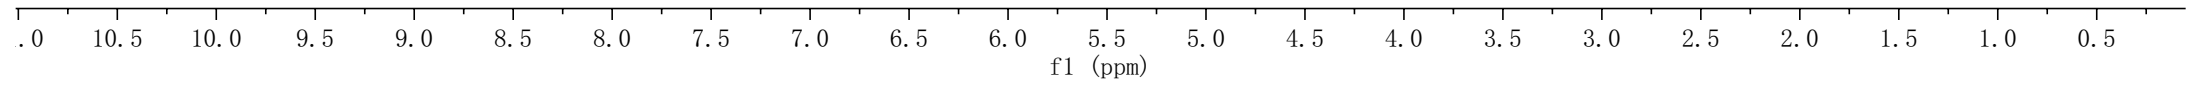

160.01  
157.53  
154.09  
150.85  
149.41  
145.11  
141.60

119.84  
119.43  
117.73  
114.00  
108.75

33.71  
29.59  
24.05

Figure S14. 100 MHz  $^{13}\text{C}$  NMR Spectrum of Compound **13** (Recorded in  $\text{DMSO-}d_6$ )

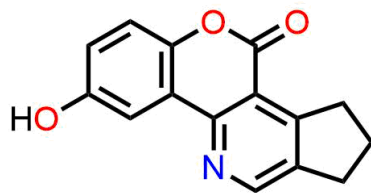

**13**

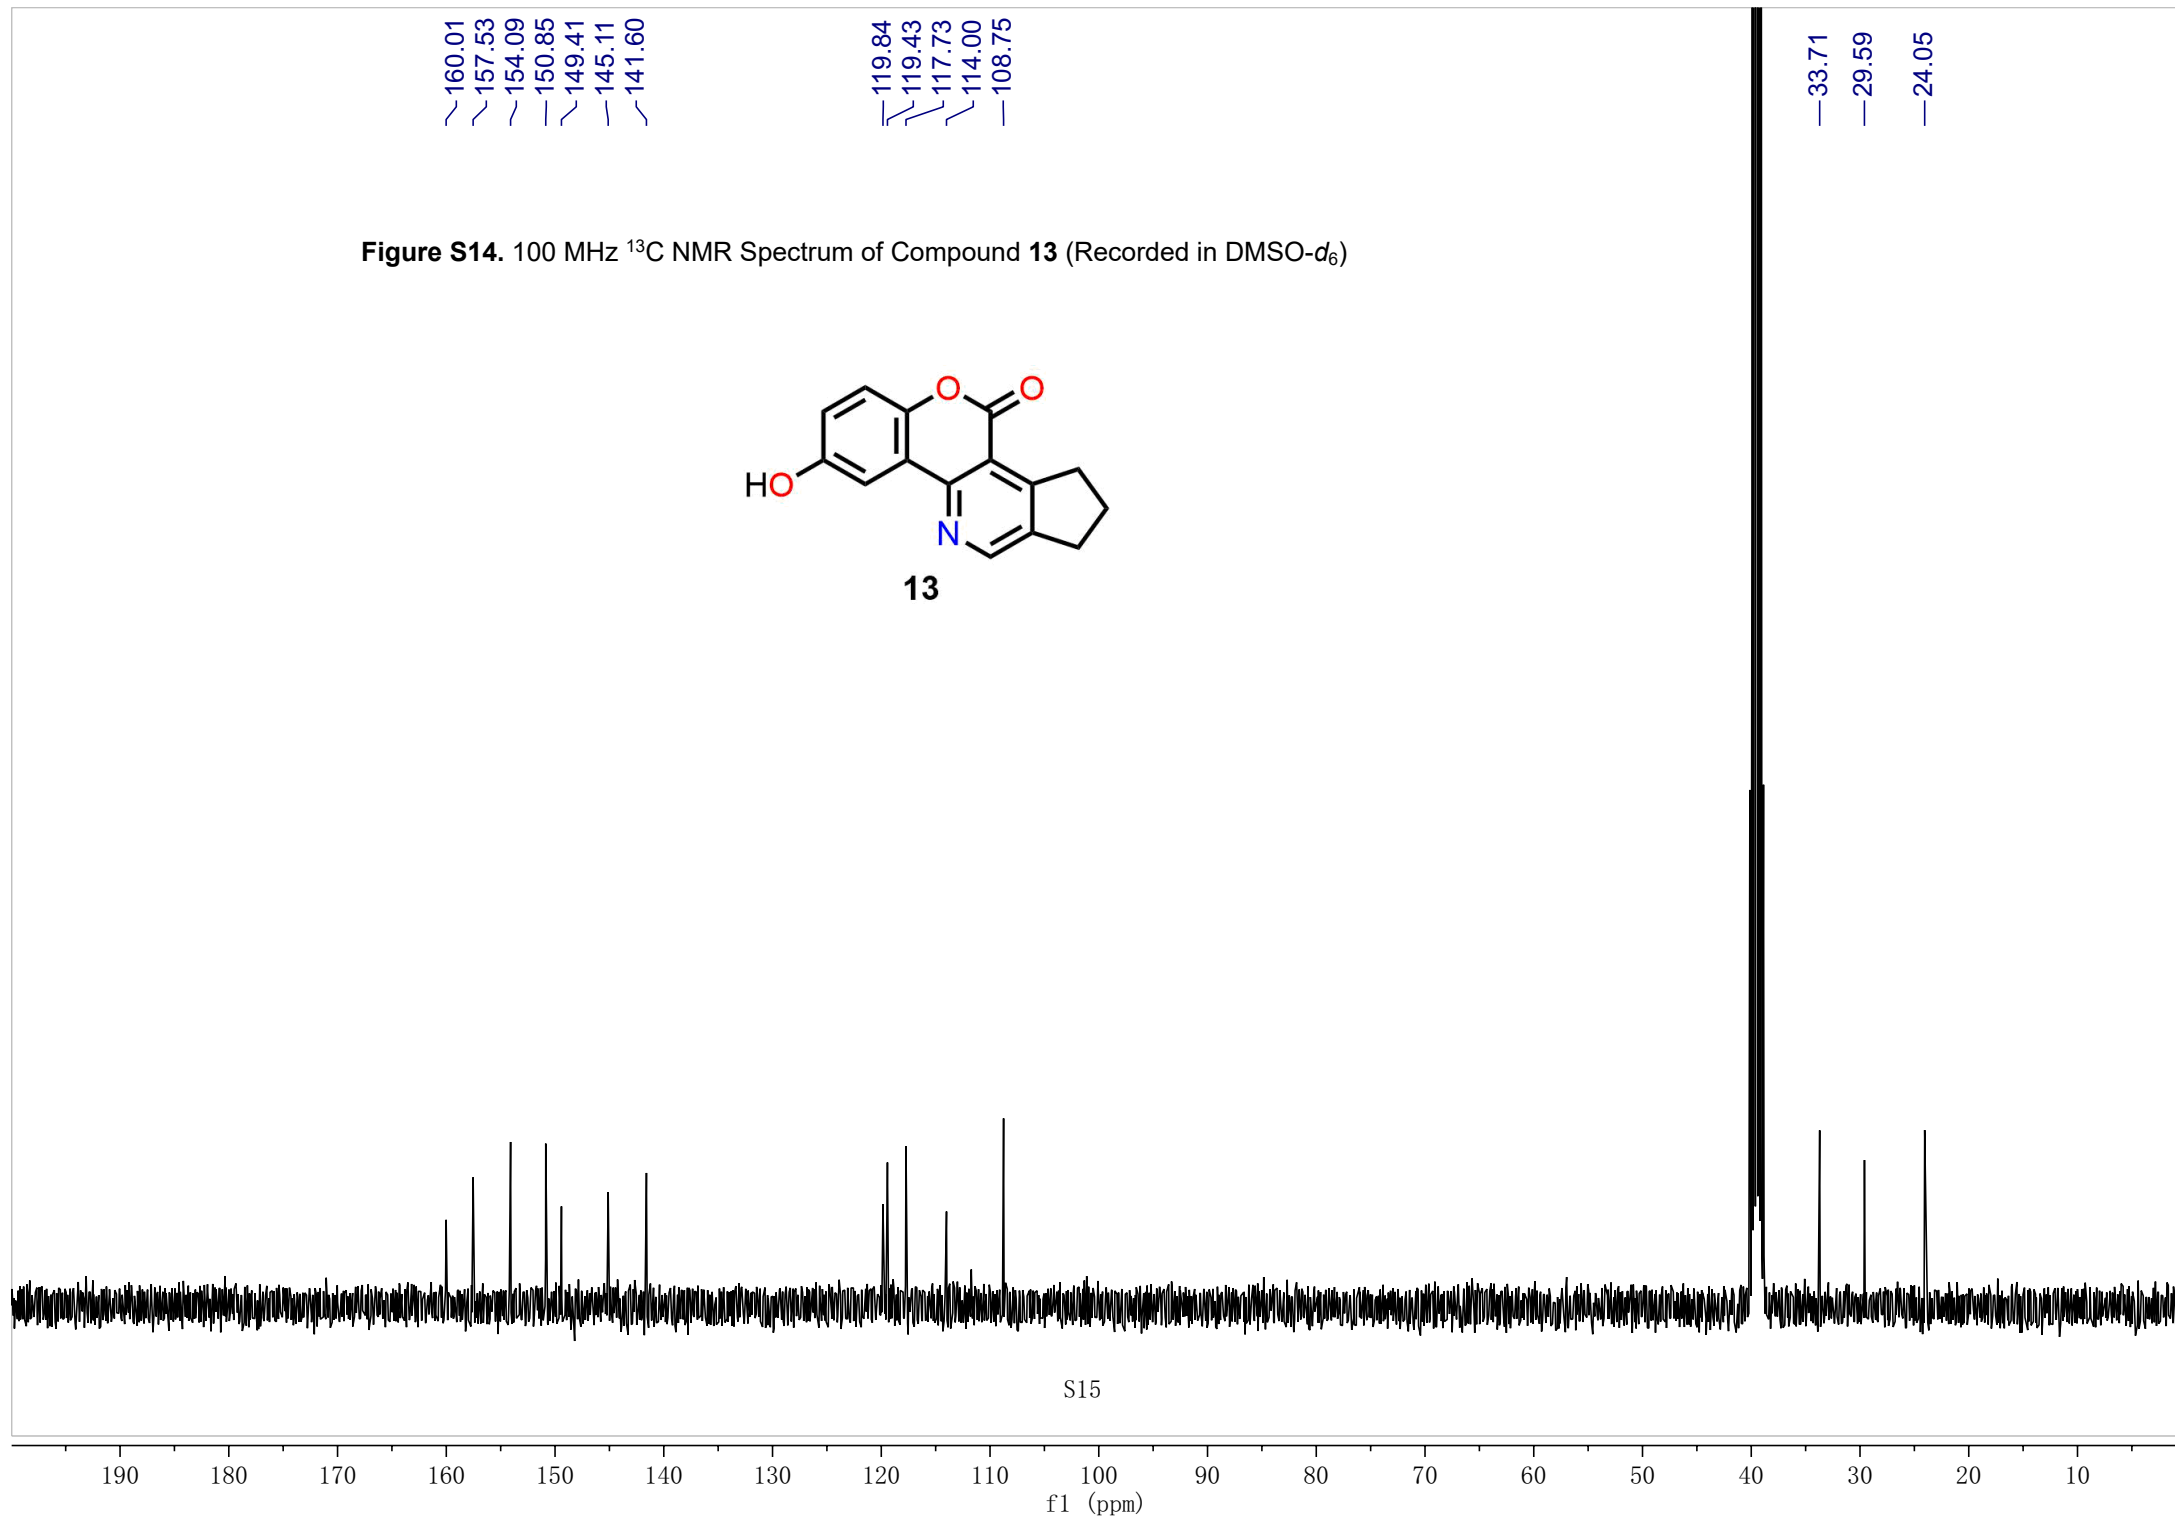

S15

Figure S15. 400 MHz <sup>1</sup>H NMR Spectrum of Compound **14** (Recorded in CDCl<sub>3</sub>)

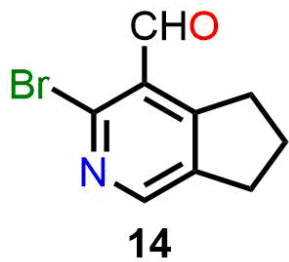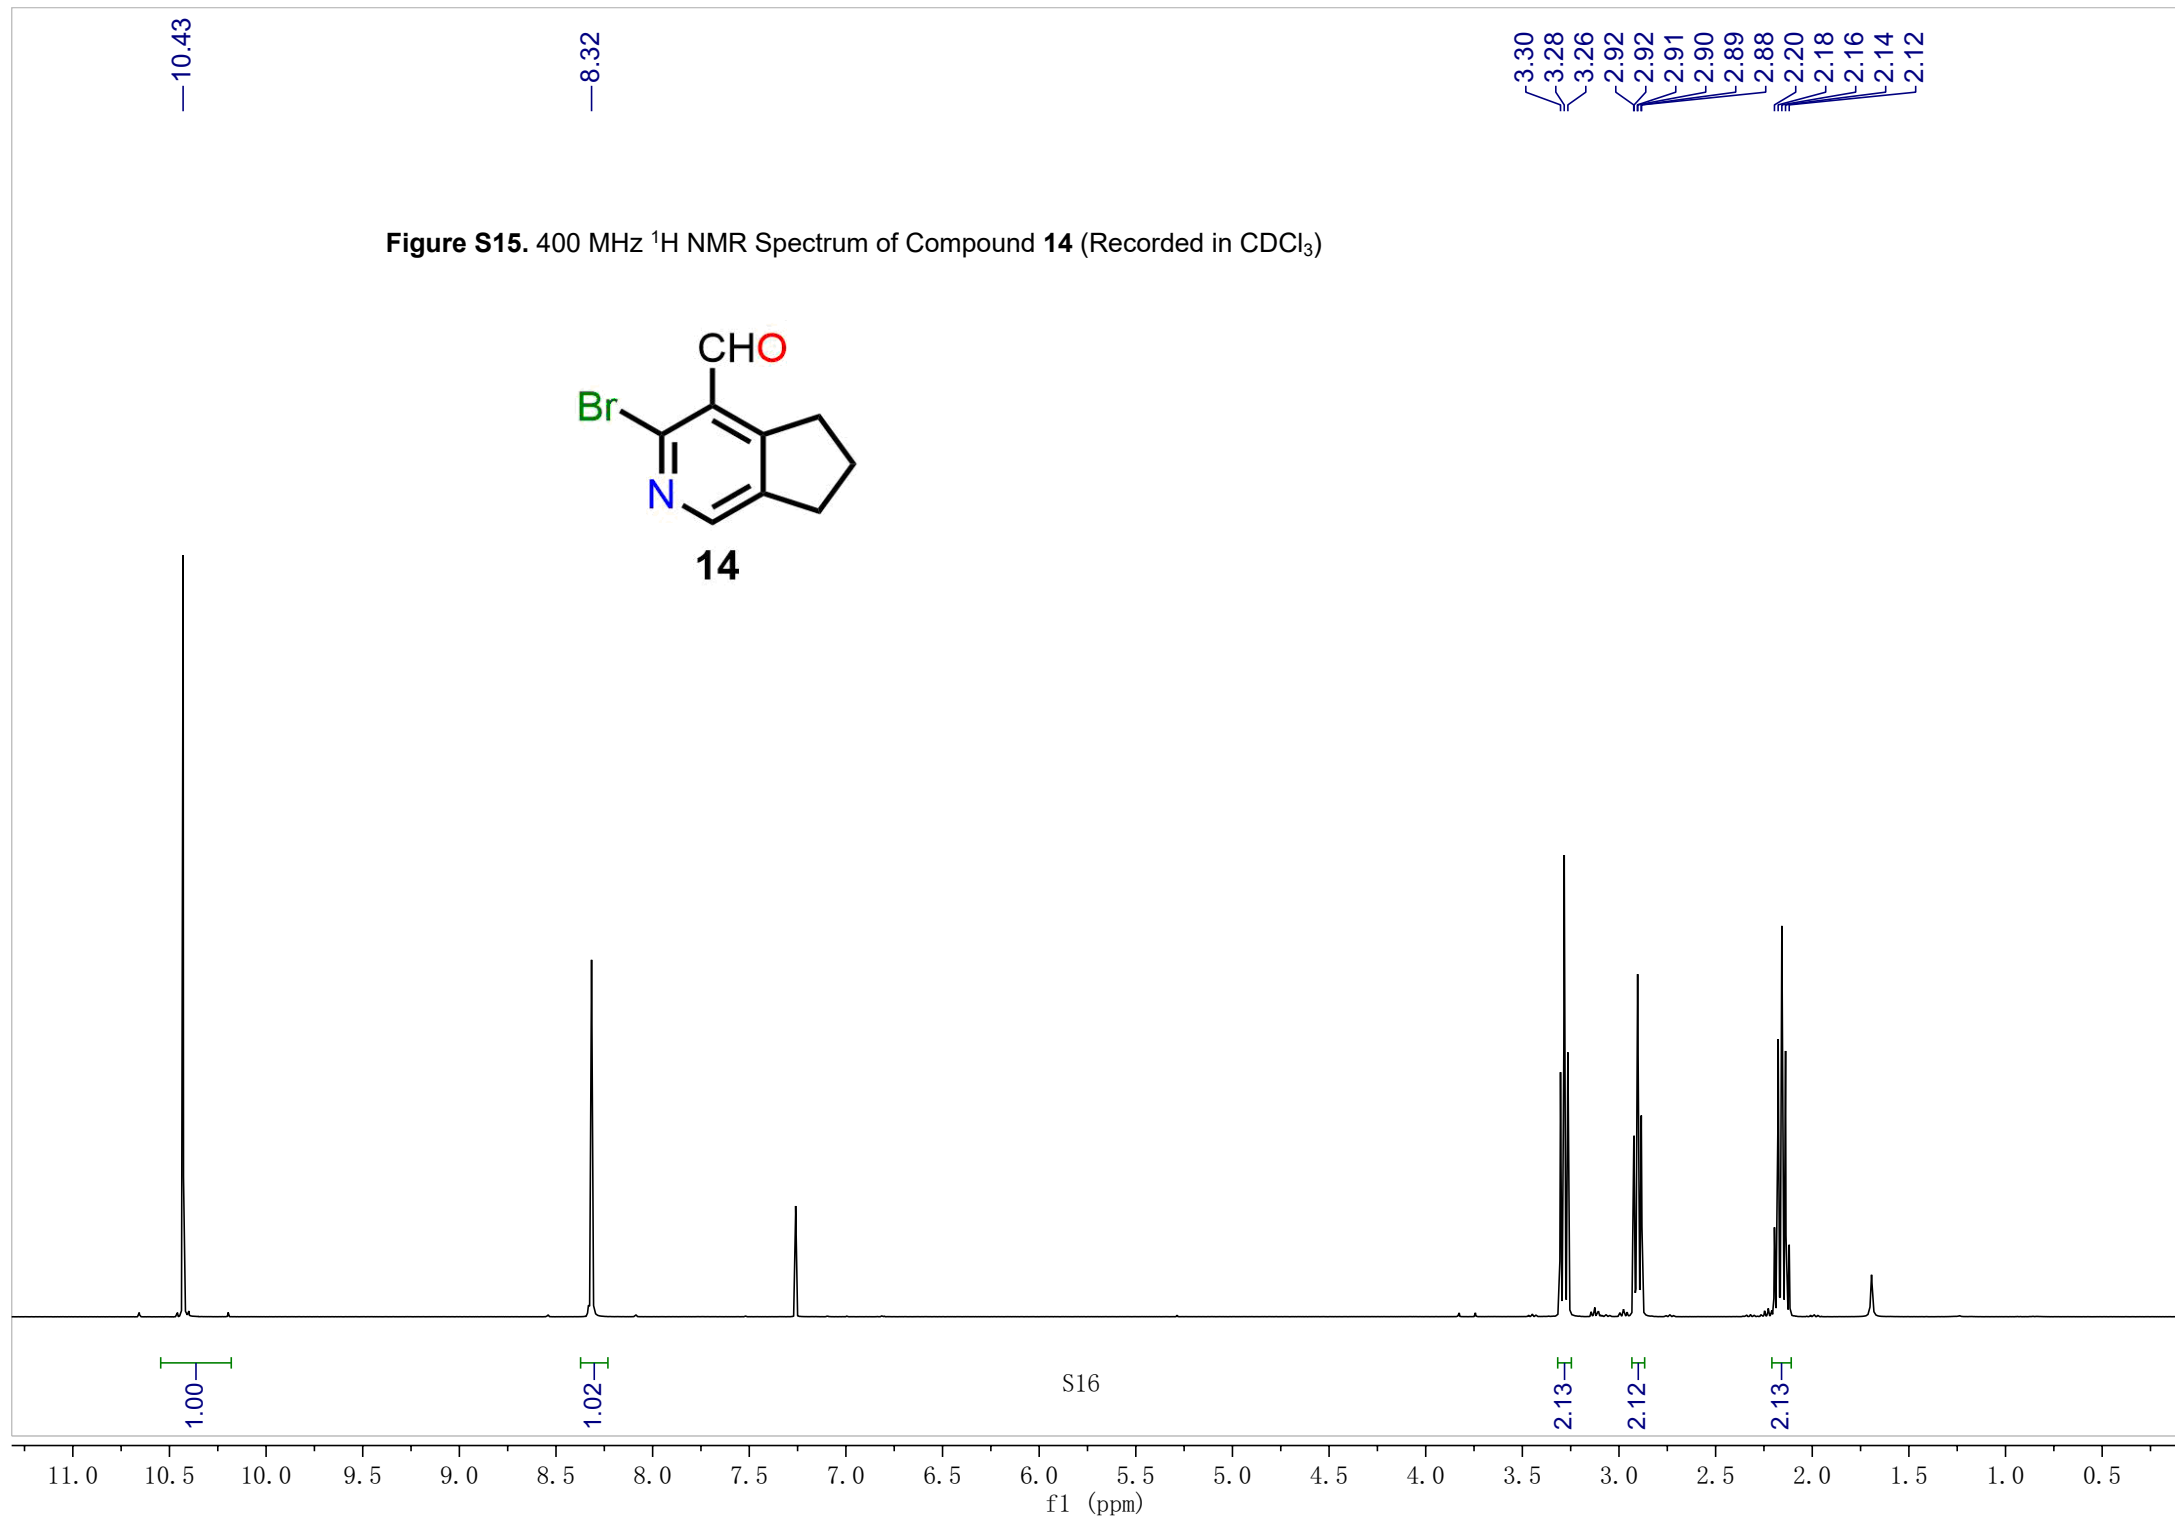



— 193.24

— 159.36

— 148.66

— 142.98

— 142.22

— 126.65

— 33.18

— 29.06

— 25.07

Figure S16. 100 MHz  $^{13}\text{C}$  NMR Spectrum of Compound **14** (Recorded in  $\text{CDCl}_3$ )

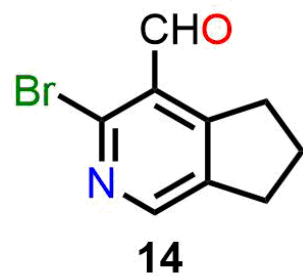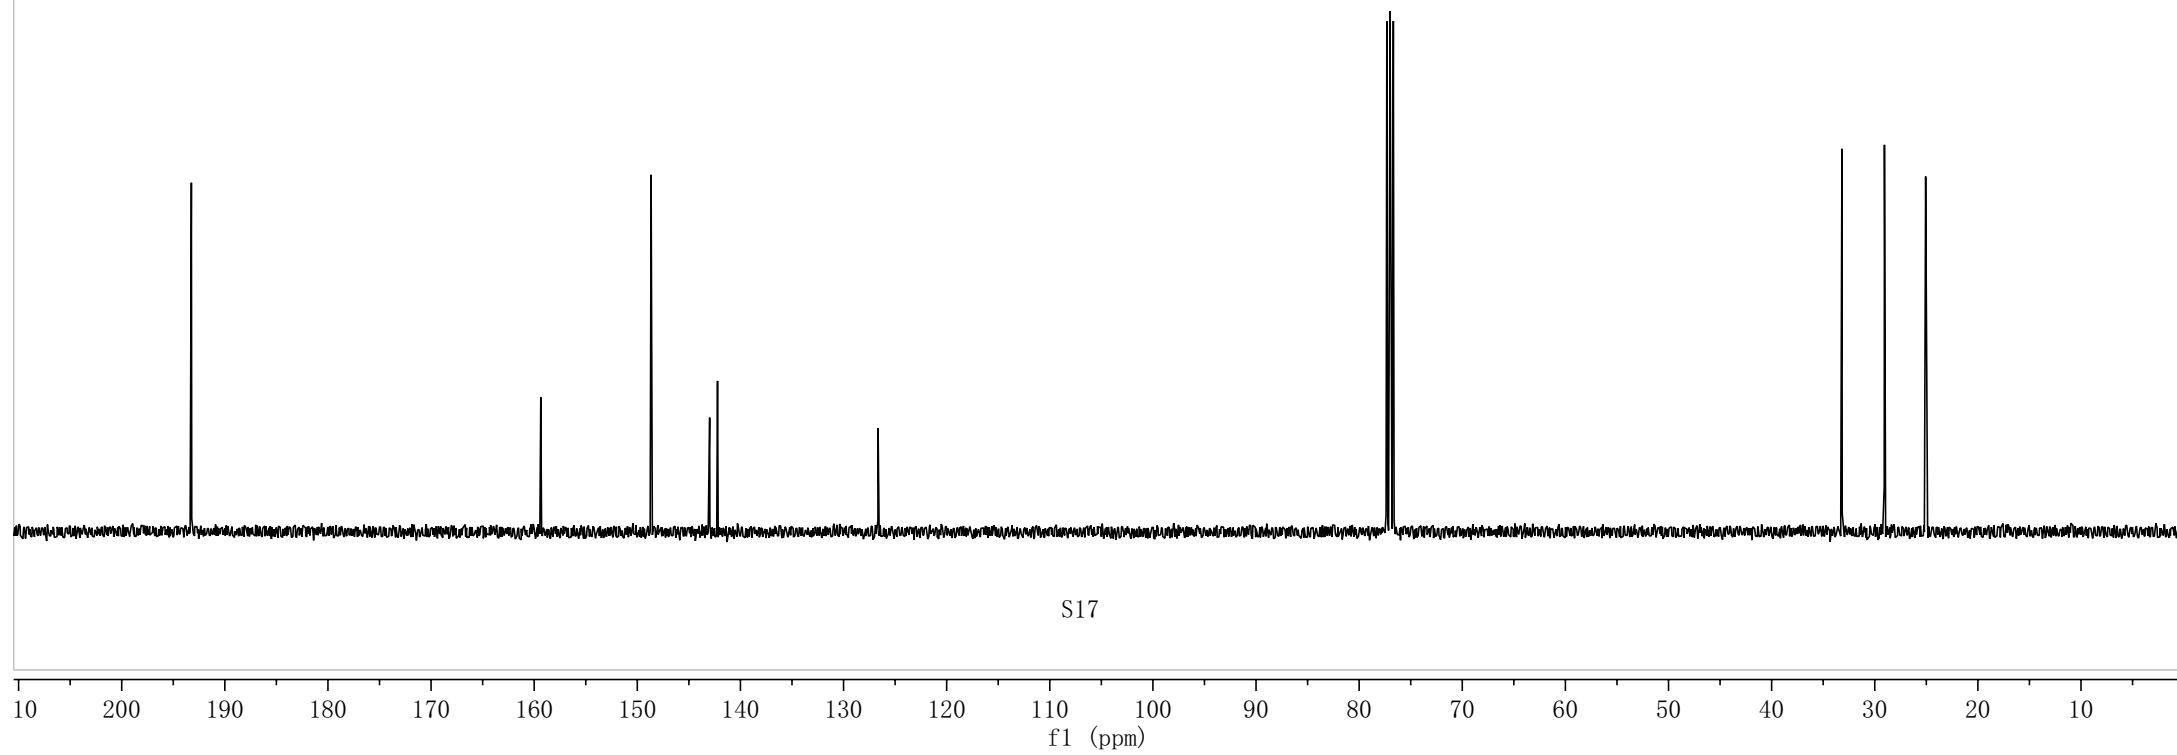

Figure S17. 400 MHz <sup>1</sup>H NMR Spectrum of Compound **15** (Recorded in CDCl<sub>3</sub>)

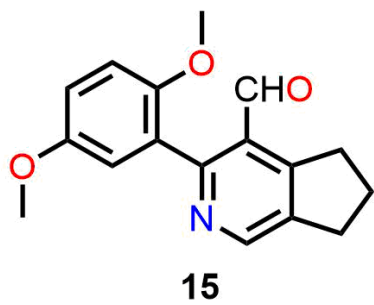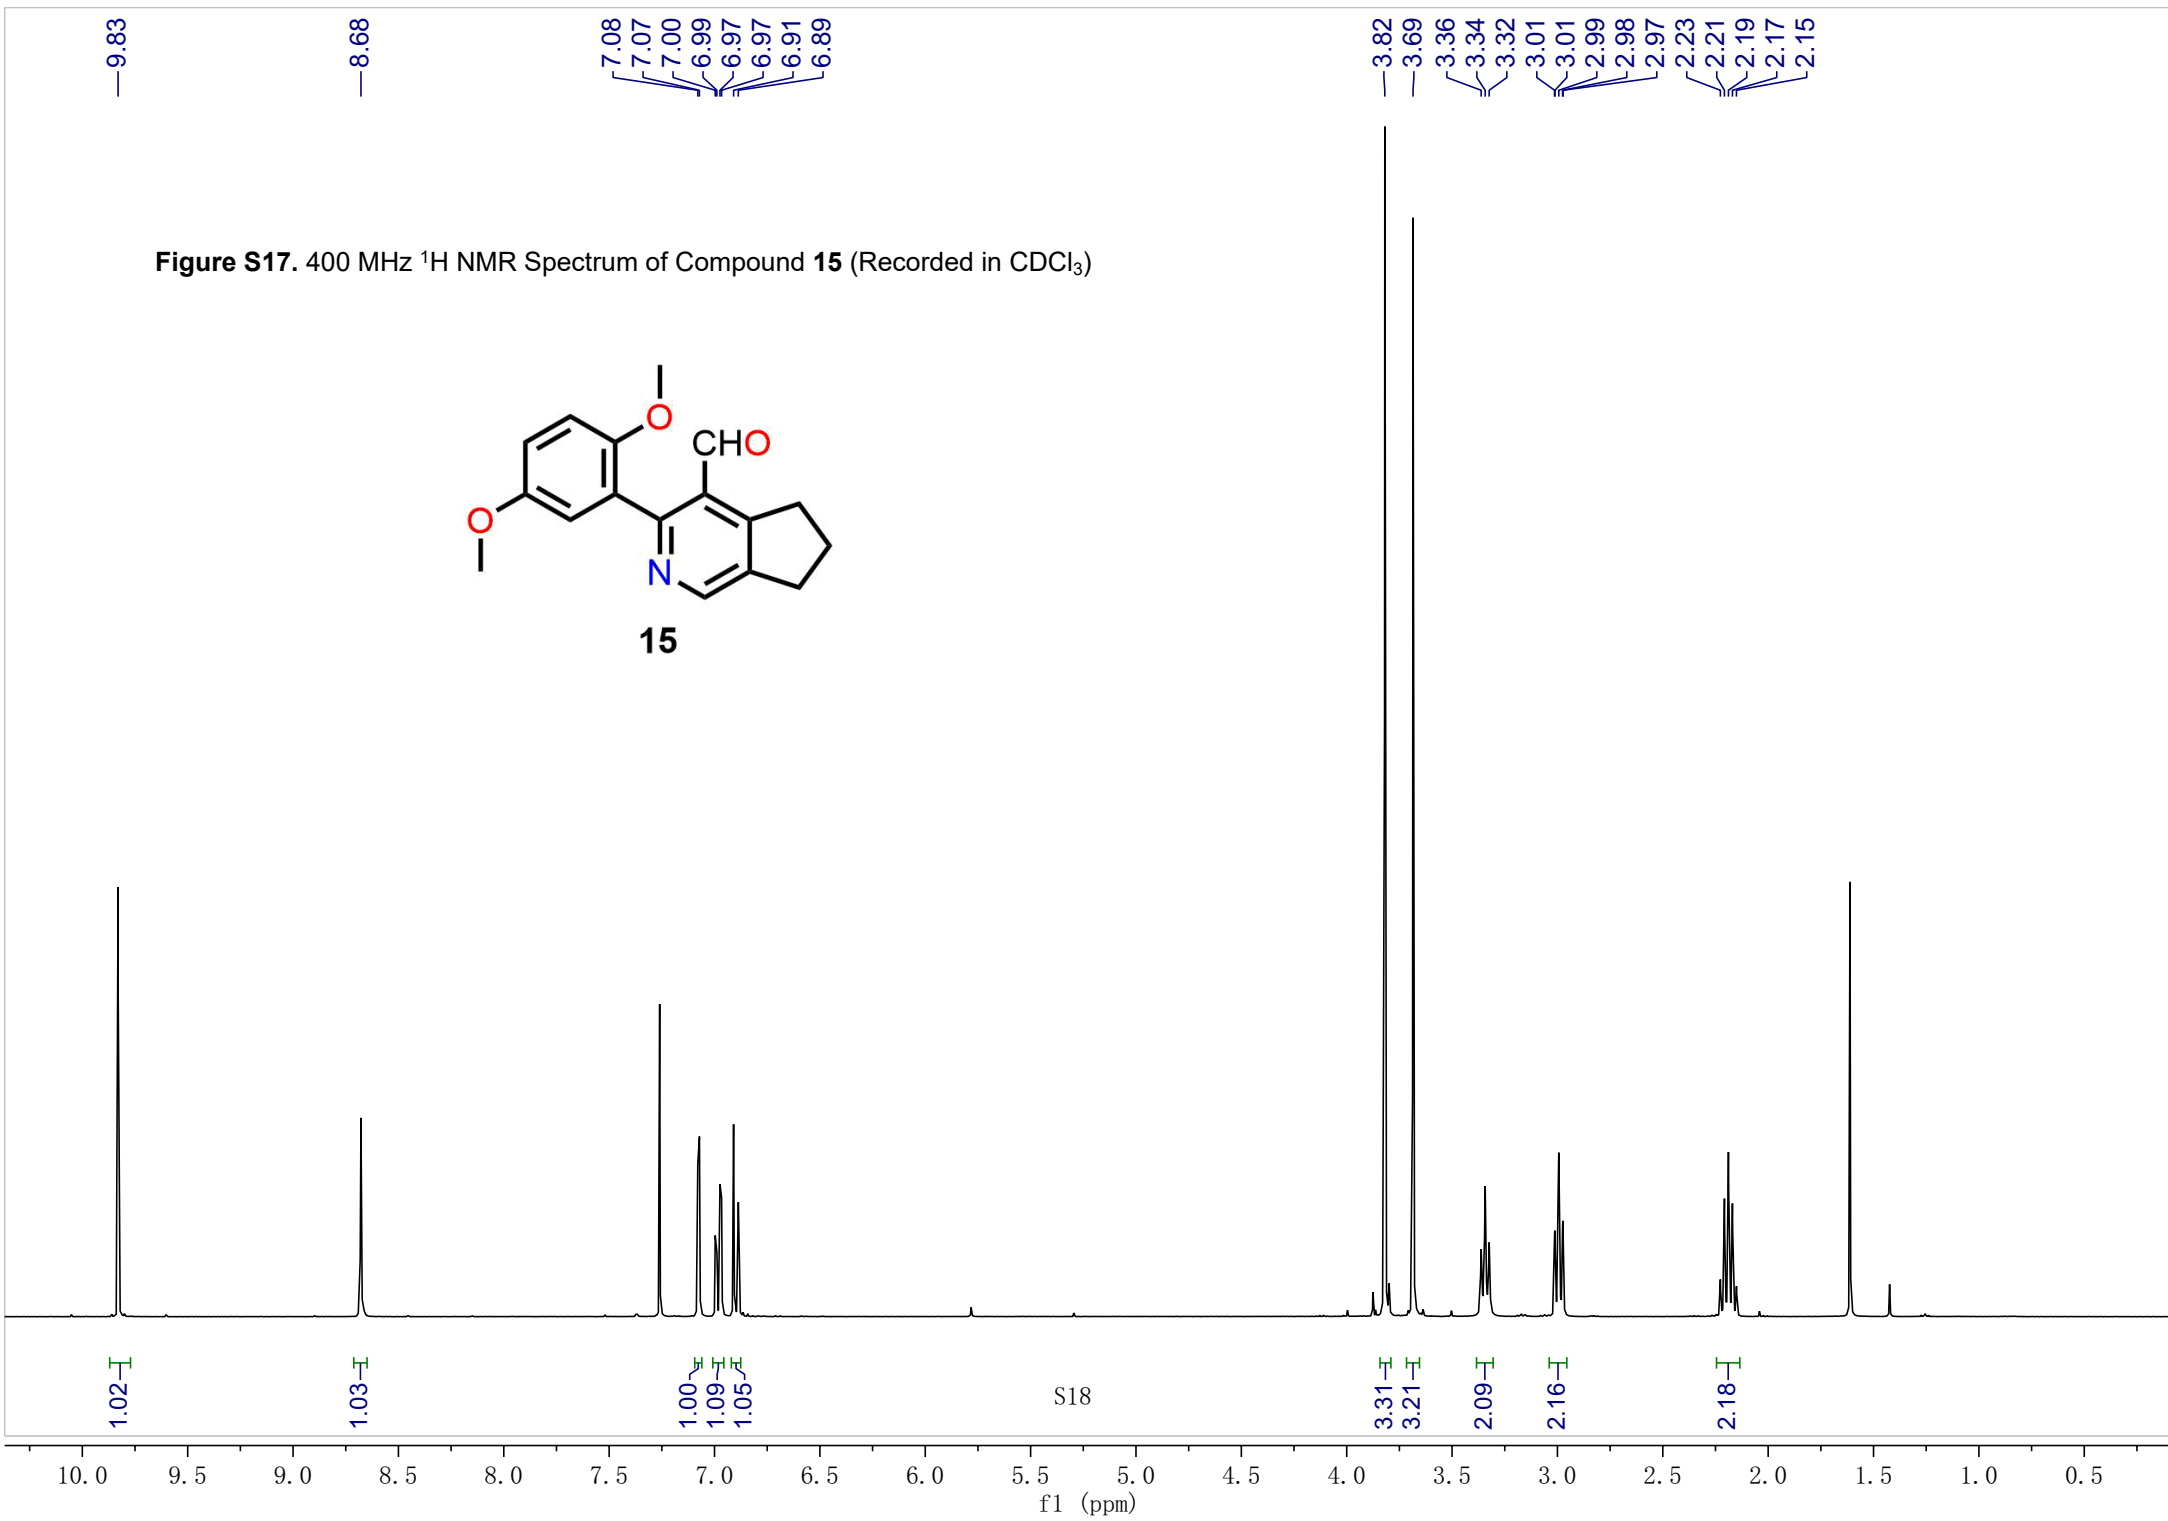

Figure S18. 100 MHz <sup>13</sup>C NMR Spectrum of Compound **15** (Recorded in CDCl<sub>3</sub>)

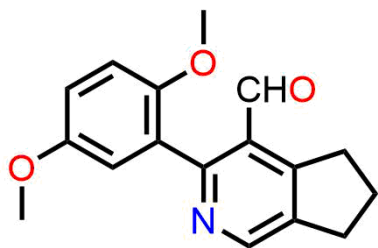

**15**

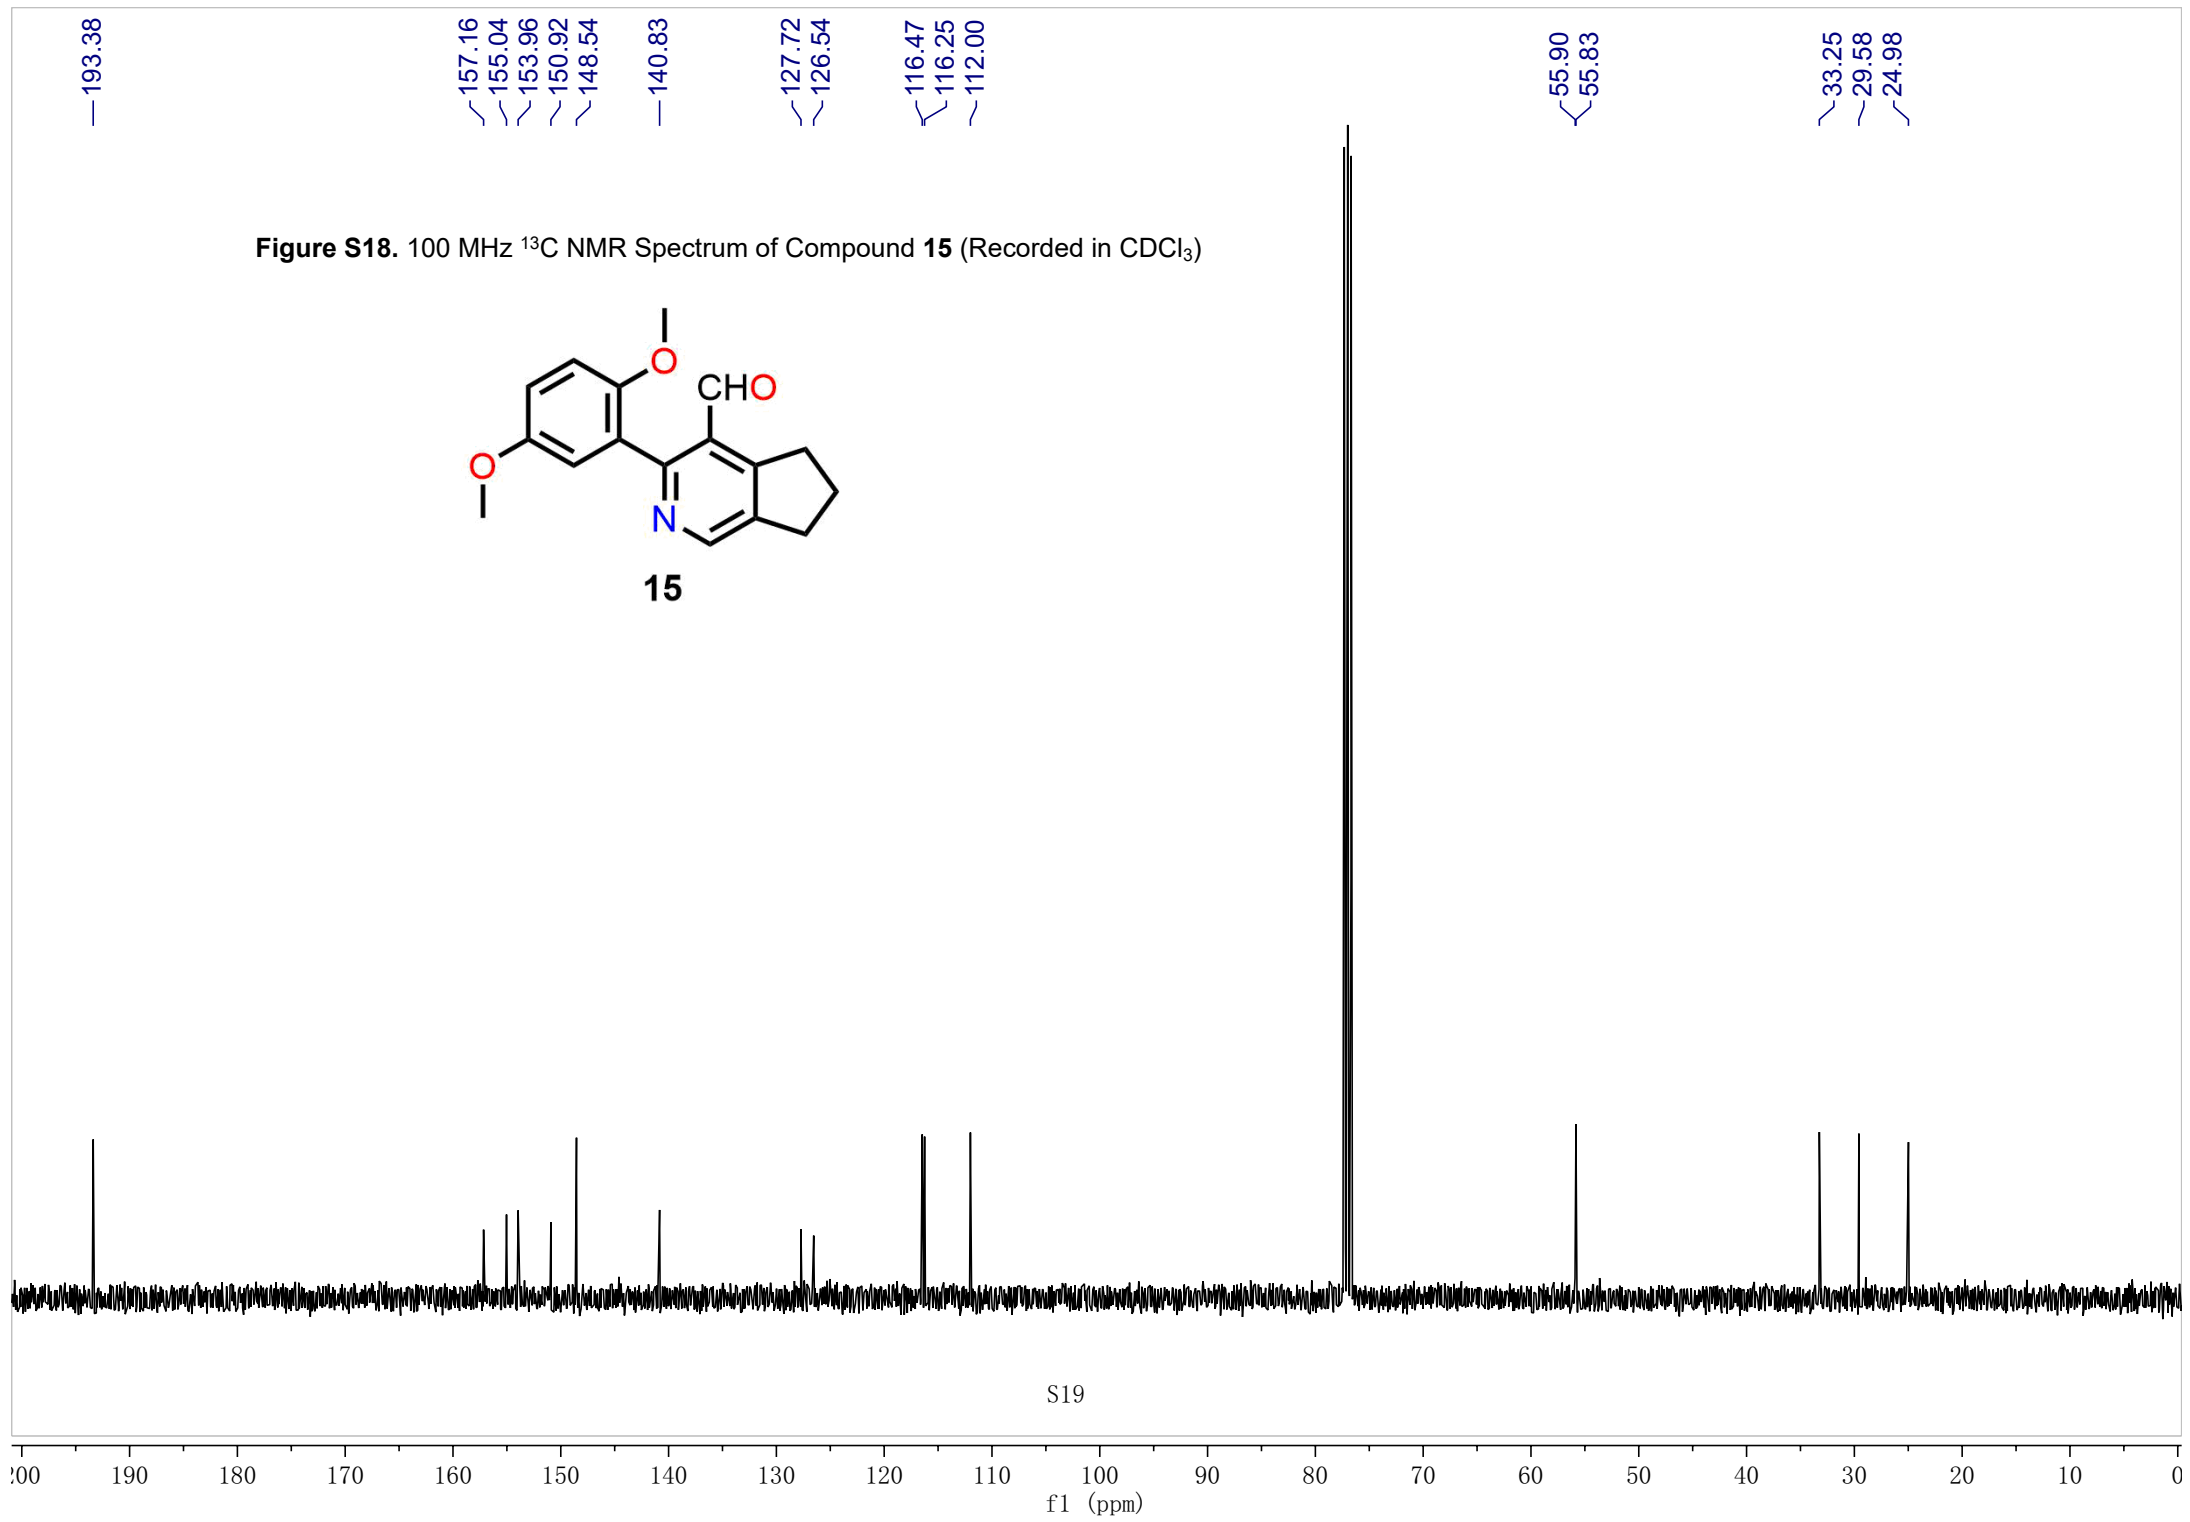

S19
